# Supplementary material for: Upper Aerodigestive Tract Squamous Cell Carcinomas Show Distinct Overall DNA Methylation Profiles and Different Molecular Mechanisms behind WNT Signaling Disruption
Source: Cancers (Basel). 2021 Jun 16;13(12):3014. doi: 10.3390/cancers13123014 (PMC8234055; doi:10.3390/cancers13123014)
Supplement: Supplementary file 1 [file cancers-13-03014-s001.zip]

Archive with 14 entries (14 files):
- Figure S1.pdf
- Figure S2.pdf
- Figure S3.pdf
- Figure S4.pdf
- Figure S5.pdf
- Figure S6.pdf
- Figure S7.pdf
- Supplementary Materials_post-revision.pdf
- Table S1.xlsx
- Table S2.xlsx
- Table S3.xlsx
- Table S4.xlsx
- Table S5.xlsx
- Table S6.xlsx
