# Supplementary material for: Upper Aerodigestive Tract Squamous Cell Carcinomas Show Distinct Overall DNA Methylation Profiles and Different Molecular Mechanisms behind WNT Signaling Disruption
Source: Cancers (Basel). 2021 Jun 16;13(12):3014. doi: 10.3390/cancers13123014 (PMC8234055; doi:10.3390/cancers13123014)
Supplement: Supplementary file 1 [file cancers-13-03014-s001.zip › Table S1.xlsx]

## Sheet: Table S1
Table S1: Characteristics of the patients included in the study.
	ESCC, n (%)	LSCC, n (%)	OSCC, n (%)	OPSCC, n (%)
Age, median (min-max)	56 (38-77)	63 (43-82)	56 (34-75)	61 (31-81)
Sex
Female	3 (12.5%)	2 (9.5%)	1 (6.3%)	1 (4.3%)
Male	21 (87.5%)	19 (90.5%)	15 (93.7%)	22 (95.7%)
Tobacco consumption
Never	1 (4.2%)	4 (19.0%)	3 (18.75%)	0 (0.0%)
Ever	21 (87.5%)	16 (76.2%)	13 (81.25%)	23 (100%)
Missing	2 (8.3%)	1 (4.8%)	0 (0.0%)	0 (0.0%)
Alcohol consumption
Never	3 (12.5%)	7 (33.3%)	4 (25.0%)	3 (13.0%)
Ever	19 (79.2%)	13 (61.9%)	12 (75.0%)	20 (87.0%)
Missing	2 (8.3%)	1 (4.8%)	0 (0.0%)	0 (0.0%)
HPV status
Negative	ND	ND	ND	18 (78.3%)
Positive	ND	ND	ND	5 (21.7%)
Tumor stage
I + II	10 (41.7%)	3 (14.3%)	3 (18.75%)	3 (13.0%)
III + IV	13 (54.2%)	18 (85.7%)	12 (75.0%)	20 (87.0%)
Missing	1 (4.1%)	0 (0.0%)	1 (6.25%)	0 (0.0%)
Legend: ESCC, esophageal squamous cell carcinoma; LSCC, laryngeal squamous cell carcinoma; ND, not determined; OSCC, oral cavity squamous cell carcinoma; OPSCC, oropharyngeal squamous cell carcinoma; n, number of samples; min, minimum value; max, maximum value.
