# Supplementary material for: Upper Aerodigestive Tract Squamous Cell Carcinomas Show Distinct Overall DNA Methylation Profiles and Different Molecular Mechanisms behind WNT Signaling Disruption
Source: Cancers (Basel). 2021 Jun 16;13(12):3014. doi: 10.3390/cancers13123014 (PMC8234055; doi:10.3390/cancers13123014)
Supplement: Supplementary file 1 [file cancers-13-03014-s001.zip › Table S2.xlsx]

## Sheet: Table S2
Table S2: Differentially methylated probes stratified by their gene position in ESCC, LSCC, OSCC and OPSCC.
	ESCC				LSCC				OSCC				OPSCC
Gene Position	# Expected	# Observed	p_value		# Expected	# Observed	p_value		# Expected	# Observed	p_value		# Expected	# Observed	p_value
1stExon	8503.88	5245	< 0.001		1621.38	1415	< 0.001		889.987	1138	< 0.001		3716.52	2756	< 0.001
TSS200	13363.6	7232	< 0.001		2566.94	1647	< 0.001		1409.17	1213	< 0.001		5857.07	3664	< 0.001
TSS1500	19511	18224	< 0.001		3470.39	3240	< 0.001		1883.61	1658	< 0.001		8032.69	7324	< 0.001
Body	43236.3	53739	< 0.001		7218.46	8899	< 0.001		3883.13	4076	< 0.001		17095.9	21182	< 0.001
3'UTR	4783.04	5566	< 0.001		816.82	1071	< 0.001		438.189	477	0.058		1931.04	2390	< 0.001
5'UTR	15320.1	14712	< 0.001		2695.02	2117	< 0.001		1473.91	1416	0.101		6273.81	5591	< 0.001
Legend: ESCC: esophageal squamous cell carcinoma, LSCC: laryngeal squamous cell carcinoma, OSCC: oral cavity squamous cell carcinoma, OPSCC: oropharyngeal squamous cell carcinoma.
