# Supplementary material for: Upper Aerodigestive Tract Squamous Cell Carcinomas Show Distinct Overall DNA Methylation Profiles and Different Molecular Mechanisms behind WNT Signaling Disruption
Source: Cancers (Basel). 2021 Jun 16;13(12):3014. doi: 10.3390/cancers13123014 (PMC8234055; doi:10.3390/cancers13123014)
Supplement: Supplementary file 1 [file cancers-13-03014-s001.zip › Table S3.xlsx]

## Sheet: Table S3
Table S3: Differentially methylated probes stratified by their relation to CpG island in ESCC. LSCC. OSCC and OPSCC.
	ESCC				LSCC				OSCC				OPSCC
Relation to CpG Island	# Expected	# Observed	p_value		# Expected	# Observed	p_value		# Expected	# Observed	p_value		# Expected	# Observed	p_value
Island	24020	12896	< 0.001		5784	3297	< 0.001		3135	4440	< 0.001		13519	7552	< 0.001
N_Shelf	3849	4354	< 0.001		929	1145	< 0.001		504	390	< 0.001		2171	2550	< 0.001
N_Shore	9929	11411	< 0.001		2398	1717	< 0.001		1301	1239	0.0664		5571	5625	0.4545
S_Shelf	3442	3759	< 0.001		831	1016	< 0.001		451	311	< 0.001		1942	2342	< 0.001
S_Shore	7787	8896	< 0.001		1878	1191	< 0.001		1019	792	< 0.001		4366	3993	< 0.001
OpenSea	27182	34894	< 0.001		6569	10023	< 0.001		3568	2806	< 0.001		15337	20845	< 0.001
Legend: ESCC: esophageal squamous cell carcinoma. LSCC: laryngeal squamous cell carcinoma. OSCC: oral cavity squamous cell carcinoma. OPSCC: oropharyngeal squamous cell carcinoma.
