# Supplementary material for: Upper Aerodigestive Tract Squamous Cell Carcinomas Show Distinct Overall DNA Methylation Profiles and Different Molecular Mechanisms behind WNT Signaling Disruption
Source: Cancers (Basel). 2021 Jun 16;13(12):3014. doi: 10.3390/cancers13123014 (PMC8234055; doi:10.3390/cancers13123014)
Supplement: Supplementary file 1 [file cancers-13-03014-s001.zip › Table S4.xlsx]

## Sheet: Table S4
Table S4: Differentially methylated probes stratified by chromosomes in ESCC, LSCC, OSCC and OPSCC.
	ESCC				LSCC				OSCC				OPSCC
Chromosome	# Expected	# Observed	p_value		# Expected	# Observed	p_value		# Expected	# Observed	p_value		# Expected	# Observed	p_value
1	7464	7921	1.9E-09		1773	1547	9.8E-09		965	893	1.4E-02		4150	4081	2.4E-01
2	5487	5531	5.1E-01		1323	1366	2.2E-01		718	748	2.5E-01		3109	3377	2.0E-07
3	3965	3959	9.2E-01		958	938	5.0E-01		519	473	3.8E-02		2237	2229	8.7E-01
4	3160	2917	1.9E-06		773	795	4.1E-01		419	416	8.9E-01		1799	1763	3.8E-01
5	3809	3755	3.4E-01		928	1137	8.1E-13		500	536	1.0E-01		2160	2318	2.8E-04
6	5665	5350	2.7E-06		1376	1277	4.9E-03		748	720	2.9E-01		3219	3192	6.0E-01
7	4623	4571	4.0E-01		1121	1214	3.8E-03		611	833	9.9E-21		2635	2904	1.6E-08
8	3301	3409	3.8E-02		803	1075	1.9E-23		430	445	4.6E-01		1881	2208	7.4E-16
9	1559	1644	1.9E-02		368	245	4.5E-11		201	137	5.1E-06		861	767	7.4E-04
10	3835	3864	6.2E-01		927	1043	7.2E-05		502	569	2.1E-03		2169	2309	1.3E-03
11	4621	4959	3.2E-08		1104	1187	9.4E-03		598	598	1.0E+00		2555	2435	1.1E-02
12	3863	3847	7.8E-01		934	899	2.4E-01		505	444	4.9E-03		2177	2173	9.3E-01
13	1893	1707	3.2E-06		466	497	1.4E-01		252	229	1.5E-01		1098	1234	1.6E-05
14	2390	2508	8.1E-03		576	663	1.9E-04		312	400	4.3E-07		1350	1466	8.4E-04
15	2383	2388	9.2E-01		578	660	4.7E-04		311	288	1.8E-01		1339	1320	5.9E-01
16	3437	3532	7.4E-02		820	688	1.6E-06		444	279	7.0E-16		1941	2056	5.2E-03
17	4473	4905	6.9E-13		1047	684	5.7E-32		573	453	2.0E-07		2459	2234	1.1E-06
18	919	791	4.7E-06		227	237	5.3E-01		124	157	2.6E-03		526	500	2.5E-01
19	4047	3971	1.9E-01		983	1103	6.6E-05		534	699	1.2E-13		2276	2204	1.1E-01
20	1649	1584	8.4E-02		400	410	6.4E-01		218	246	5.4E-02		929	889	1.7E-01
21	677	749	3.1E-03		158	106	2.8E-05		86	57	1.7E-03		371	345	1.6E-01
22	1332	1359	4.3E-01		314	190	6.6E-13		172	125	2.9E-04		729	538	9.4E-14
X	1644	985	3.0E-70		426	427	9.7E-01		231	233	9.2E-01		924	359	7.7E-86
Y	15	4	4.2E-03		4	1	2.2E-01		4	0	1.0E-01		11	6	1.2E-01
Legend: ESCC: esophageal squamous cell carcinoma, LSCC: laryngeal squamous cell carcinoma, OSCC: oral cavity squamous cell carcinoma, OPSCC: oropharyngeal squamous cell carcinoma.
