# Supplementary material for: Upper Aerodigestive Tract Squamous Cell Carcinomas Show Distinct Overall DNA Methylation Profiles and Different Molecular Mechanisms behind WNT Signaling Disruption
Source: Cancers (Basel). 2021 Jun 16;13(12):3014. doi: 10.3390/cancers13123014 (PMC8234055; doi:10.3390/cancers13123014)
Supplement: Supplementary file 1 [file cancers-13-03014-s001.zip › Table S5.xlsx]

## Sheet: Table S5
Table S5: Over-representation (ORA) analysis of genes carrying DMRs in ESCC, LSCC, OSCC and OPSCC.
ESCC: Over-representation analysis of DMR-containing genes
GeneSet	Description	Size	Count	enrichmentRatio	FDR	Genes affected
hsa04015	Rap1 signaling pathway	206	69	1.68	3.81E-04	CALML6;PRKCZ;PIK3CD;EPHA2;RAP1GAP;PIK3R3;LPAR3;NGF;EFNA3;RASSF5;CALML5;CALML3;ITGB1;PARD3;FGFR2;HRAS;SIPA1;FGF3;FGF6;LPAR5;RAPGEF3;KITLG;ADCY4;PGF;AKT1;THBS1;PLCB2;ADCY9;GRIN2A;LAT;ITGAL;ITGAM;ADCY7;PARD6A;CDH1;BCAR1;ADORA2B;MAP2K3;NGFR;PRKCA;EFNA2;AKT2;CALM3;RALB;GNAS;ITGB2;PDGFB;MAPK12;MAGI1;P2RY1;FGFR3;PDGFRA;ADCY2;PIK3R1;F2R;FGF1;CSF1R;LCP2;RGS14;PDGFA;RAPGEF5;ADCY1;EGFR;MAGI2;BRAF;ANGPT2;FGF…
hsa04390	Hippo signaling pathway	154	55	1.79	3.81E-04	PRKCZ;TP73;WNT4;BMP8A;WNT9A;WNT3A;PARD3;PPP2R2D;CCND1;DLG2;WNT5B;WNT1;AJUBA;FRMD6;TGFB3;SMAD3;PARD6A;CDH1;DLG4;LLGL1;WNT3;BIRC5;CSNK1D;SMAD7;AMH;ID2;GDF7;CTNNA2;GLI2;FZD7;WNT6;BMP2;BMP7;ITGB2;WNT7A;TGFBR2;LIMD1;RASSF1;WNT5A;WWTR1;DVL3;PPP2R2C;RASSF6;TCF7;FGF1;FBXW11;CCN2;FRMD1;FZD1;SERPINE1;PPP2R2A;GDF6;STK3;MYC;CRB2
hsa04514	Cell adhesion molecules (CAMs)	144	52	1.81	3.81E-04	VTCN1;CADM3;CD34;ITGB1;LRRC4C;CD6;NRXN2;NCAM1;NECTIN1;JAM3;CLDN10;CLDN9;CLDN6;SPN;ITGAL;ITGAM;CDH5;CDH1;ICAM2;ICAM3;CD22;SDC1;CD8A;CD28;PDCD1;SDC4;CDH4;NCAM2;CLDN14;ITGB2;CD86;CLDN11;OCLN;HLA-F;HLA-G;HLA-A;HLA-E;HLA-C;HLA-DRA;HLA-DRB5;HLA-DQB1;HLA-DOB;HLA-DMB;HLA-DMA;HLA-DOA;HLA-DPA1;HLA-DPB1;CLDN3;CLDN4;CNTNAP2;CLDN23;CD40LG
hsa04072	Phospholipase D signaling pathway	146	52	1.79	3.81E-04	PIK3CD;PIK3R3;PTGFR;LPAR3;FCER1G;HRAS;DGKZ;LPAR5;RAPGEF3;DGKA;KITLG;ADCY4;AKT1;PLCB2;PLA2G4E;PLA2G4D;PLA2G4F;TSC2;ADCY9;ADCY7;PIK3R6;PRKCA;GRB2;CYTH1;SHC2;PIP5K1C;DNM2;AKT2;RALB;CXCR1;AVP;GNAS;AGPAT3;PDGFB;GRM2;DGKG;PDGFRA;ADCY2;PIK3R1;F2R;GRM6;AGPAT1;GRM4;FYN;AGPAT4;PDGFA;GNA12;ADCY1;EGFR;GRM3;PIK3CG;ADCY8
hsa05166	Human T-cell leukemia virus 1 infection	255	80	1.58	3.81E-04	PIK3CD;WNT4;SLC2A1;PIK3R3;CDKN2C;JUN;WNT9A;WNT3A;BUB3;HRAS;SPI1;FOSL1;CCND1;POLD3;WNT5B;TNFRSF1A;LTBR;WNT1;POLE;ADCY4;TGFB3;AKT1;SMAD3;ADCY9;ITGAL;ADCY7;VAC14;GPS2;KAT2A;STAT5A;WNT3;NFATC1;CALR;PRKACA;JAK3;CRTC1;AKT2;FZD7;WNT6;NFATC2;ITGB2;IL2RB;PDGFB;TSPO;WNT7A;TGFBR2;WNT5A;DVL3;MSX1;PDGFRA;TERT;ADCY2;MAP3K1;PIK3R1;CSF2;EGR1;MSX2;HLA-F;HLA-G;HLA-A;HLA-E;HLA-C;TNF;HLA-DRA;HLA-DRB5;HLA-DQB1;HLA-DO…
hsa05330	Allograft rejection	38	20	2.64	3.81E-04	PRF1;CD28;CD86;IL12A;HLA-F;HLA-G;HLA-A;HLA-E;HLA-C;TNF;HLA-DRA;HLA-DRB5;HLA-DQB1;HLA-DOB;HLA-DMB;HLA-DMA;HLA-DOA;HLA-DPA1;HLA-DPB1;CD40LG
hsa04940	Type I diabetes mellitus	43	21	2.45	8.75E-04	PRF1;CD28;CD86;IL12A;CPE;HLA-F;HLA-G;HLA-A;HLA-E;HLA-C;TNF;HLA-DRA;HLA-DRB5;HLA-DQB1;HLA-DOB;HLA-DMB;HLA-DMA;HLA-DOA;HLA-DPA1;HLA-DPB1;PTPRN2
hsa04550	Signaling pathways regulating pluripotency of stem cells	139	48	1.73	0.001355515	PIK3CD;WNT4;PIK3R3;SETDB1;WNT9A;WNT3A;BMI1;NODAL;FGFR2;HRAS;PAX6;WNT5B;NANOG;WNT1;LHX5;TBX3;HNF1A;AKT1;ONECUT1;SMAD3;ZFHX3;STAT3;WNT3;GRB2;JAK3;AKT2;ID2;OTX1;MEIS1;INHBB;ACVR1C;FZD7;WNT6;MAPK12;WNT7A;WNT5A;DVL3;FGFR3;ISL1;IL6ST;PIK3R1;NEUROG1;HAND1;ID4;POU5F1;FZD1;DLX5;MYC
hsa04750	Inflammatory mediator regulation of TRP channels	99	37	1.88	0.001390234	CALML6;PIK3CD;PIK3R3;NGF;CALML5;CALML3;P2RY2;ADCY4;BDKRB2;PLCB2;PLA2G4E;PLA2G4D;PLA2G4F;ADCY9;ADCY7;TRPV3;TRPV1;ALOX12;MAP2K3;ASIC2;PRKCA;PRKACA;CALM3;PRKCE;ASIC4;GNAS;MAPK12;ITPR1;HRH1;ADCY2;PTGER4;PIK3R1;F2RL1;CAMK2B;ADCY1;ADCY8;HTR2C
hsa04020	Calcium signaling pathway	183	59	1.62	0.001484223	CALML6;HTR6;PTAFR;PTGER3;PTGFR;CACNA1E;RYR2;CALML5;CALML3;STIM1;CCKBR;CHRM1;CACNA1C;PDE1B;ERBB3;NOS1;P2RX7;LTB4R2;ADCY4;BDKRB2;PLCB2;ITPKA;CACNA1H;ADCY9;GRIN2A;ADCY7;ATP2A3;ADORA2B;PRKCA;GNAL;GNA11;GNA15;CACNA1A;PRKACA;RYR1;ITPKC;CALM3;SLC8A2;PDE1A;TNNC2;GNAS;NTSR1;ITPR1;HRH1;DRD5;CD38;PDGFRA;TACR3;ADCY2;F2R;MYLK4;CAMK2B;ADCY1;EGFR;PHKG1;NOS3;ADCY8;HTR2C;ATP2B3
hsa04928	Parathyroid hormone synthesis. secretion and action	106	38	1.80	0.002577191	RXRG;GATA3;CREB3L1;MMP13;PTHLH;MMP17;ADCY4;PLCB2;MEF2A;ADCY9;ADCY7;ARRB2;SOST;PRKCA;GNA11;CREB3L3;PRKACA;NR4A2;MAFB;GNAS;ITPR1;PTH1R;CASR;SLC34A2;ADCY2;EGR1;SLC34A1;GCM2;ATF6B;RXRB;CDKN1A;GNA12;CREB5;ADCY1;EGFR;BRAF;ADCY8;RXRA
hsa04915	Estrogen signaling pathway	137	46	1.69	0.002847173	CALML6;PIK3CD;PIK3R3;JUN;CALML5;CALML3;HRAS;CREB3L1;KRT18;ADCY4;HSPA2;AKT1;PLCB2;ADCY9;ADCY7;RARA;KRT12;KRT23;KRT40;KRT33A;KRT31;KRT32;KRT13;KRT19;KRT14;GRB2;SHC2;CREB3L3;PRKACA;AKT2;CALM3;GNAS;TFF1;ITPR1;ADCY2;PIK3R1;GABBR1;HSPA1L;HSPA1B;ATF6B;ESR1;CREB5;ADCY1;EGFR;NOS3;ADCY8
hsa05332	Graft-versus-host disease	41	19	2.33	0.002895599	PRF1;CD28;CD86;HLA-F;HLA-G;HLA-A;HLA-E;HLA-C;TNF;HLA-DRA;HLA-DRB5;HLA-DQB1;HLA-DOB;HLA-DMB;HLA-DMA;HLA-DOA;HLA-DPA1;HLA-DPB1;IL6
hsa04921	Oxytocin signaling pathway	152	49	1.62	0.004583811	CALML6;JUN;RYR2;CALML5;CALML3;CACNB2;HRAS;CCND1;GUCY1A2;CACNA2D4;CACNA1C;ADCY4;PLCB2;PLA2G4E;PLA2G4D;PLA2G4F;ADCY9;EEF2K;CACNG3;ADCY7;PIK3R6;KCNJ12;PRKCA;CACNG5;ROCK1;NFATC1;PRKACA;RYR1;CALM3;PRKAG3;OXT;MYL9;NFATC2;GNAS;TRPM2;ITPR1;CAMK1;CACNA2D3;CD38;ADCY2;MYLK4;CDKN1A;CAMK2B;ADCY1;EGFR;PIK3CG;NOS3;PRKAG2;ADCY8
hsa05205	Proteoglycans in cancer	201	61	1.52	0.005085321	PIK3CD;HSPG2;WNT4;PIK3R3;WNT9A;WNT3A;ITGB1;HPSE2;HRAS;IGF2;CCND1;CTTN;RDX;HSPB2;WNT5B;PTPN6;NANOG;WNT1;ERBB3;DCN;AKT1;THBS1;STAT3;WNT3;MIR10A;PRKCA;GRB2;ROCK1;PRKACA;AKT2;SDC1;HOXD10;MIR10B;FZD7;WNT6;IHH;TWIST2;GPC1;SDC4;MAPK12;ITPR1;WNT7A;WNT5A;FLNB;HCLS1;PIK3R1;TNF;CDKN1A;COL21A1;ESR1;TWIST1;CAMK2B;EGFR;FZD1;CAV2;BRAF;SHH;ANK1;MYC;TLR4;GPC3
hsa04925	Aldosterone synthesis and secretion	96	34	1.78	0.005352807	CALML6;ATP1A2;CALML5;CALML3;CREB3L1;CACNA1C;NR4A1;SCARB1;ADCY4;PLCB2;CYP11A1;CACNA1H;ADCY9;ADCY7;PRKCA;GNA11;CREB3L3;PRKACA;CALM3;PRKCE;NR4A2;GNAS;ITPR1;CAMK1;ADCY2;CYP21A2;ATF6B;CREB5;CAMK2B;ADCY1;STAR;ADCY8;KCNK9;ATP2B3
hsa04080	Neuroactive ligand-receptor interaction	277	79	1.43	0.005481449	GABRD;HTR6;CNR2;PTAFR;GRIK3;LEPR;PTGER3;PTGFR;LPAR3;ADORA3;ADORA1;PARD3;NPY4R;GRID1;DRD4;CCKBR;CHRM1;P2RY2;GRIK4;P2RX7;MLNR;LTB4R2;CTSG;PTGDR;BDKRB2;GABRB3;GABRA5;GABRG3;SSTR5;GRIN2A;TRPV1;CHRNB1;ADORA2B;GALR2;GCGR;UTS2R;GALR1;S1PR4;S1PR5;GRIK5;NTSR2;FSHR;SCTR;CHRND;GPR35;SSTR4;NTSR1;SSTR3;GALR3;TSPO;HRH1;PTH1R;GRM2;P2RY1;GHSR;ADRA2C;DRD5;CHRNA9;GABRA4;GABRB1;GRID2;TACR3;PTGER4;GZMA;F2R;F2RL1;GRI…
hsa04927	Cortisol synthesis and secretion	64	25	1.96	0.005481449	PBX1;KCNK2;CREB3L1;CACNA1C;NR4A1;SCARB1;ADCY4;PLCB2;CYP11A1;CACNA1H;ADCY9;ADCY7;GNA11;CREB3L3;PRKACA;GNAS;ITPR1;ADCY2;CYP21A2;ATF6B;CREB5;ADCY1;STAR;ADCY8;NR5A1
hsa04360	Axon guidance	175	54	1.55	0.005481449	PRKCZ;PIK3CD;EPHA2;WNT4;EPHB2;PIK3R3;SEMA6C;EFNA3;SEMA4A;ITGB1;PARD3;CXCL12;UNC5B;SLIT1;SEMA4G;ABLIM1;HRAS;LRRC4C;RHOD;WNT5B;EFNB2;SEMA4B;FES;PARD6A;PRKCA;ROCK1;DCC;EFNA2;SEMA6B;GDF7;SEMA4C;NFATC2;BMP7;PLXNB2;PLXNB1;SEMA3F;SEMA3B;SEMA3G;WNT5A;ROBO2;ROBO1;BOC;SEMA5B;PLXNA1;EPHB3;ABLIM2;SLIT2;EPHA5;PIK3R1;UNC5A;FYN;CAMK2B;SHH;EFNB1
hsa05310	Asthma	31	15	2.43	0.005481449	FCER1G;PRG2;RNASE3;EPX;TNF;HLA-DRA;HLA-DRB5;HLA-DQB1;HLA-DOB;HLA-DMB;HLA-DMA;HLA-DOA;HLA-DPA1;HLA-DPB1;CD40LG
hsa04261	Adrenergic signaling in cardiomyocytes	144	46	1.60	0.005964027	CALML6;TPM3;ATP1A2;RYR2;CALML5;CALML3;CACNB2;PPP2R2D;KCNQ1;CREB3L1;FXYD2;SCN4B;CACNA2D4;CACNA1C;RAPGEF3;MYL2;ADCY4;PPP2R5C;AKT1;ACTC1;PLCB2;TPM1;ADCY9;CACNG3;ADCY7;PIK3R6;PRKCA;CACNG5;CREB3L3;PRKACA;TPM4;AKT2;CALM3;GNAS;MAPK12;CACNA2D3;PPP2R2C;ADCY2;ATF6B;CREB5;CAMK2B;ADCY1;PIK3CG;PPP2R2A;ADCY8;ATP2B3
hsa04371	Apelin signaling pathway	137	44	1.61	0.006636863	GNB1;CALML6;RYR2;CALML5;CALML3;HRAS;PDE3B;CCND1;MYL2;NOS1;ADCY4;AKT1;PLCB2;SMAD3;MEF2A;ADCY9;ADCY7;CDH1;GABARAPL2;PIK3R6;GNGT2;GNG7;PRKACA;NOTCH3;KLF2;RYR1;AKT2;CALM3;SLC8A2;PRKCE;PRKAG3;HDAC4;ITPR1;UCP1;ADCY2;EGR1;MYLK4;CCN2;ADCY1;SERPINE1;PIK3CG;NOS3;PRKAG2;ADCY8
hsa05416	Viral myocarditis	59	23	1.96	0.007740579	PRF1;CCND1;ITGAL;CD28;ITGB2;CD86;EIF4G1;HLA-F;HLA-G;HLA-A;HLA-E;HLA-C;HLA-DRA;HLA-DRB5;HLA-DQB1;HLA-DOB;HLA-DMB;HLA-DMA;HLA-DOA;HLA-DPA1;HLA-DPB1;FYN;CD40LG
hsa04971	Gastric acid secretion	75	27	1.81	0.011135633	CALML6;ATP1A2;KCNK2;CALML5;CALML3;KCNQ1;CCKBR;KCNJ1;ATP4B;ADCY4;KCNK10;PLCB2;ADCY9;ADCY7;PRKCA;PRKACA;CALM3;GNAS;KCNJ15;ITPR1;SST;ADCY2;MYLK4;CAMK2B;ADCY1;CFTR;ADCY8
hsa05226	Gastric cancer	149	46	1.55	0.011502574	PIK3CD;WNT4;PIK3R3;RXRG;WNT9A;WNT3A;FGFR2;HRAS;MUC2;CCND1;FGF3;WNT5B;FGF6;CDKN1B;WNT1;CSNK1A1L;TGFB3;AKT1;SMAD3;CDH1;WNT3;GRB2;SHC2;AKT2;CTNNA2;FZD7;WNT6;WNT7A;RARB;TGFBR2;WNT5A;TERC;DVL3;TERT;PIK3R1;TCF7;FGF1;RXRB;CDKN1A;EGFR;FZD1;BRAF;SHH;FGF20;MYC;RXRA
hsa05202	Transcriptional misregulation in cancer	186	55	1.49	0.011533757	PAX7;HDAC1;CDKN2C;PBX1;RXRG;SLC45A3;BMI1;HHEX;TLX1;LDB1;WT1;LMO2;SPI1;ZBTB16;FLI1;CDKN1B;DUSP6;CEBPE;SIX1;BCL11B;SPINT1;ITGAM;MAF;RARA;NGFR;MPO;ASPSCR1;ELANE;CEBPA;ID2;MEIS1;PAX3;RUNX1;ERG;TMPRSS2;IL2RB;TGFBR2;MITF;CD86;ETV5;BCL6;PROM1;CSF2;CSF1R;TLX3;RXRB;CDKN1A;PDGFA;IL6;HOXA9;IGFBP3;EYA1;MYC;TRAF1;RXRA
hsa04724	Glutamatergic synapse	114	37	1.63	0.011533757	GNB1;GRIK3;SLC17A6;SHANK2;GRIK4;CACNA1C;SLC38A1;SLC17A8;ADCY4;PLCB2;PLA2G4E;PLA2G4D;PLA2G4F;ADCY9;GRIN2A;ADCY7;DLG4;GNGT2;PRKCA;DLGAP1;GNG7;CACNA1A;PRKACA;SLC1A6;GRIK5;GNAS;ITPR1;SLC38A3;GRM2;ADCY2;GRIA1;GRM6;GRM4;GRIK2;ADCY1;GRM3;ADCY8
hsa04024	cAMP signaling pathway	199	58	1.46	0.011533757	CALML6;PIK3CD;HTR6;PIK3R3;JUN;PTGER3;ATP1A2;ADORA1;RYR2;CALML5;CALML3;CNGA4;PDE3B;CREB3L1;CHRM1;FXYD2;CACNA1C;RAPGEF3;ADCY4;AKT1;SSTR5;ADCY9;GRIN2A;ADCY7;PPP1R1B;SOX9;ROCK1;NFATC1;HCN2;AMH;CREB3L3;PRKACA;FXYD1;AKT2;CALM3;FSHR;CNGA3;MYL9;GNAS;GHSR;ACOX3;DRD5;ADCY2;PIK3R1;F2R;GRIA1;GABBR1;HTR1B;PDE10A;CREB5;GLI3;CAMK2B;ADCY1;CFTR;BRAF;VIPR2;ADCY8;ATP2B3
hsa04934	Cushing syndrome	154	47	1.53	0.011533757	WNT4;CDKN2C;PBX1;RBBP5;KCNK2;WNT9A;WNT3A;CREB3L1;AIP;CCND1;WNT5B;CACNA1C;CDKN1B;WNT1;NR4A1;SCARB1;ADCY4;PLCB2;CYP11A1;CACNA1H;ADCY9;ADCY7;WNT3;GNA11;CREB3L3;PRKACA;FZD7;WNT6;GNAS;ITPR1;WNT7A;WNT5A;DVL3;ADCY2;TCF7;CYP21A2;ATF6B;CDKN1A;CREB5;CAMK2B;ADCY1;EGFR;FZD1;BRAF;STAR;ADCY8;NR5A1
hsa05221	Acute myeloid leukemia	66	24	1.83	0.014496327	PIK3CD;PIK3R3;HRAS;SPI1;CCND1;ZBTB16;DUSP6;CEBPE;AKT1;ITGAM;RARA;STAT5A;STAT3;MPO;GRB2;CEBPA;AKT2;RUNX1;PIK3R1;CSF2;TCF7;CSF1R;BRAF;MYC
hsa04916	Melanogenesis	101	33	1.64	0.01690782	CALML6;WNT4;WNT9A;WNT3A;CALML5;CALML3;HRAS;CREB3L1;WNT5B;WNT1;KITLG;ADCY4;PLCB2;ADCY9;ADCY7;WNT3;PRKCA;CREB3L3;PRKACA;CALM3;FZD7;WNT6;GNAS;WNT7A;WNT5A;MITF;DVL3;ADCY2;TCF7;CAMK2B;ADCY1;FZD1;ADCY8
hsa05145	Toxoplasmosis	113	36	1.60	0.017068398	LAMB3;ITGB1;ALOX5;TNFRSF1A;HSPA2;TGFB3;AKT1;PIK3R6;MAP2K3;STAT3;LAMA3;AKT2;LAMA5;TAB1;MAPK12;LAMB2;IL12A;TNF;HSPA1L;HSPA1B;HLA-DRA;HLA-DRB5;HLA-DQB1;HLA-DOB;HLA-DMB;HLA-DMA;HLA-DOA;HLA-DPA1;HLA-DPB1;MAP3K7;LAMA4;PIK3CG;LAMB1;LAMB4;TLR4;CD40LG
hsa04913	Ovarian steroidogenesis	49	19	1.95	0.017247581	ALOX5;SCARB1;ADCY4;PLA2G4E;PLA2G4D;PLA2G4F;CYP11A1;CYP1A1;ADCY9;ADCY7;PRKACA;CYP1B1;FSHR;GNAS;ADCY2;CGA;ADCY1;STAR;ADCY8
hsa04976	Bile secretion	71	25	1.77	0.017321569	SLC2A1;ATP1A2;EPHX1;FXYD2;NR1H4;SCARB1;SLC10A2;ADCY4;AQP9;ADCY9;ADCY7;ABCC3;PRKACA;SCTR;GNAS;SLC51A;SLC4A4;SLC9A3;ADCY2;KCNN2;AQP1;ADCY1;CFTR;ADCY8;RXRA
hsa05320	Autoimmune thyroid disease	53	20	1.90	0.018306375	PRF1;TPO;CD28;CD86;HLA-F;HLA-G;HLA-A;HLA-E;HLA-C;HLA-DRA;HLA-DRB5;HLA-DQB1;HLA-DOB;HLA-DMB;HLA-DMA;HLA-DOA;HLA-DPA1;HLA-DPB1;CGA;CD40LG
hsa04022	cGMP-PKG signaling pathway	163	48	1.48	0.019005227	CALML6;NPPB;ADORA3;ATP1A2;ADORA1;CALML5;CALML3;MRVI1;PDE3B;CREB3L1;GUCY1A2;FXYD2;CACNA1C;ADCY4;BDKRB2;AKT1;PLCB2;MEF2A;ADCY9;ADCY7;ATP2A3;PIK3R6;ROCK1;NFATC1;GNA11;CREB3L3;AKT2;CALM3;SLC8A2;PRKCE;MYL9;NFATC2;ITPR1;KCNMB3;ADRA2C;ADCY2;MYLK4;ATF6B;GNA12;CREB5;ADCY1;GTF2IRD1;PIK3CG;NOS3;GATA4;KCNU1;ADCY8;ATP2B3
hsa05200	Pathways in cancer	526	131	1.25	0.019005227	GNB1;CALML6;PLEKHG5;PIK3CD;WNT4;HDAC1;CSF3R;HEYL;SLC2A1;PIK3R3;JUN;PTGER3;LPAR3;GSTM5;TPM3;RXRG;RASSF5;LAMB3;WNT9A;WNT3A;CALML5;CALML3;ITGB1;CXCL12;FGFR2;CTBP2;HRAS;IGF2;SPI1;GSTP1;CCND1;FGF3;FADD;ZBTB16;WNT5B;FGF6;LPAR5;CDKN1B;WNT1;KITLG;BRCA2;COL4A2;ADCY4;PGF;TGFB3;BDKRB2;AKT1;PLCB2;SMAD3;ADCY9;ADCY7;CDH1;RARA;STAT5A;STAT3;WNT3;GNGT2;PRKCA;GRB2;BIRC5;ROCK1;LAMA3;DCC;GNG7;GNA11;PRKACA;NOTCH3;JAK…
hsa05146	Amoebiasis	96	31	1.62	0.02314415	PIK3CD;PIK3R3;LAMB3;MUC2;COL4A2;CTSG;TGFB3;PLCB2;ITGAM;COL1A1;PRKCA;GNAL;LAMA3;GNA11;GNA15;PRKACA;COL4A3;GNAS;LAMA5;ITGB2;LAMB2;IL12A;PIK3R1;CSF2;TNF;LAMA4;IL6;ADCY1;LAMB1;LAMB4;TLR4
hsa04213	Longevity regulating pathway	62	22	1.78	0.024863699	PIK3CD;HDAC1;PIK3R3;HRAS;CRYAB;ADCY4;HSPA2;AKT1;ADCY9;ADCY7;RPTOR;PRKACA;AKT2;PRKAG3;FOXA2;ADCY2;PIK3R1;HSPA1L;HSPA1B;ADCY1;PRKAG2;ADCY8
hsa04912	GnRH signaling pathway	93	30	1.62	0.025989876	CALML6;JUN;CALML5;CALML3;HRAS;CACNA1C;ADCY4;PLCB2;PLA2G4E;PLA2G4D;PLA2G4F;ADCY9;ADCY7;MAP2K3;PRKCA;GRB2;GNA11;PRKACA;CALM3;GNAS;MAPK12;ITPR1;ADCY2;MAP3K1;EGR1;CGA;CAMK2B;ADCY1;EGFR;ADCY8
hsa04010	MAPK signaling pathway	295	78	1.33	0.02639836	EPHA2;STMN1;MAP3K6;JUN;NGF;EFNA3;CACNA1E;PTPN7;CACNB2;MAP3K8;DUSP5;FGFR2;HRAS;IGF2;RPS6KA4;MAP3K11;FGF3;CACNA2D4;CACNA1C;FGF6;NTF3;TNFRSF1A;NR4A1;ERBB3;KITLG;DUSP6;TAOK3;HSPA2;PGF;TGFB3;AKT1;PLA2G4E;PLA2G4D;PLA2G4F;CACNA1H;MAPK8IP3;CACNG3;ARRB2;MAP2K3;TAOK1;NGFR;PRKCA;CACNG5;GRB2;NFATC1;EFNA2;MKNK2;CACNA1A;PRKACA;MAP4K1;AKT2;PPM1B;PDGFB;TAB1;MAPK12;TGFBR2;CACNA2D3;FLNB;FGFR3;PDGFRA;MAP3K1;FGF1;CS…
hsa04918	Thyroid hormone synthesis	74	25	1.70	0.02639836	ATP1A2;CREB3L1;FXYD2;ADCY4;GPX2;PLCB2;DUOX2;ADCY9;ADCY7;ASGR2;PRKCA;CREB3L3;PRKACA;TPO;GNAS;ITPR1;ADCY2;GPX3;GPX6;GPX5;ATF6B;CGA;CREB5;ADCY1;ADCY8
hsa04310	Wnt signaling pathway	146	43	1.48	0.02639836	CTNNBIP1;WNT4;JUN;VANGL2;WNT9A;WNT3A;CTBP2;FOSL1;CCND1;WNT5B;WNT1;CSNK1A1L;PLCB2;SMAD3;SERPINF1;SOST;WNT3;PRKCA;NOTUM;NFATC1;PRKACA;FZD7;WNT6;NFATC2;WNT7A;WNT5A;PRICKLE2;DVL3;CTBP1;SFRP2;NKD2;TCF7;FBXW11;CSNK2B;MAP3K7;SFRP4;CAMK2B;FZD1;SFRP1;DKK4;SOX17;MYC;PORCN
hsa04926	Relaxin signaling pathway	130	39	1.51	0.02740207	GNB1;PRKCZ;PIK3CD;PIK3R3;JUN;HRAS;CREB3L1;MMP13;NOS1;COL4A2;ADCY4;AKT1;PLCB2;SMAD3;ADCY9;ADCY7;ARRB2;GNGT2;COL1A1;PRKCA;GRB2;SHC2;GNG7;GNA15;CREB3L3;PRKACA;AKT2;COL4A3;GNAS;MAPK12;TGFBR2;ADCY2;PIK3R1;ATF6B;CREB5;ADCY1;EGFR;NOS3;ADCY8
hsa05150	Staphylococcus aureus infection	56	20	1.79	0.03008313	C1QC;PTAFR;C1R;ITGAL;ITGAM;DSG1;CFD;ITGB2;C2;CFB;HLA-DRA;HLA-DRB5;HLA-DQB1;HLA-DOB;HLA-DMB;HLA-DMA;HLA-DOA;HLA-DPA1;HLA-DPB1;PLG
hsa04611	Platelet activation	123	37	1.51	0.031141808	PRKCZ;PIK3CD;PIK3R3;FCER1G;ITGB1;STIM1;FERMT3;GUCY1A2;ADCY4;AKT1;PLCB2;PLA2G4E;PLA2G4D;PLA2G4F;ADCY9;ADCY7;PIK3R6;COL1A1;ROCK1;PRKACA;AKT2;GP6;GNAS;MAPK12;ITPR1;GP9;P2RY1;ADCY2;PIK3R1;F2R;LCP2;MYLK4;FYN;ADCY1;PIK3CG;NOS3;ADCY8
hsa04933	AGE-RAGE signaling pathway in diabetic complications	99	31	1.57	0.031553441	PRKCZ;PIK3CD;PIK3R3;JUN;HRAS;CCND1;NOX4;CDKN1B;COL4A2;TGFB3;AKT1;PLCB2;SMAD3;CCL2;STAT5A;STAT3;COL1A1;PRKCA;NFATC1;AKT2;PRKCE;COL4A3;MAPK12;TGFBR2;PIK3R1;EGR1;TNF;AGER;IL6;SERPINE1;NOS3
hsa05163	Human cytomegalovirus infection	225	61	1.36	0.033574578	GNB1;CALML6;PIK3CD;PIK3R3;PTGER3;CALML5;CALML3;CXCL12;HRAS;CREB3L1;CCND1;FADD;TNFRSF1A;ADCY4;AKT1;PLCB2;TSC2;ADCY9;ADCY7;BCAR1;CCL2;CCL5;STAT3;GNGT2;PRKCA;GRB2;ROCK1;NFATC1;GNG7;GNA11;CREB3L3;CALR;PRKACA;AKT2;CALM3;NFATC2;GNAS;MAPK12;ITPR1;CCR1;PDGFRA;ADCY2;PTGER4;PIK3R1;HLA-F;HLA-G;HLA-A;HLA-E;HLA-C;TNF;ATF6B;TAP2;TAPBP;CDKN1A;GNA12;IL6;CREB5;ADCY1;EGFR;MYC;ADCY8
hsa04725	Cholinergic synapse	112	34	1.52	0.035085365	GNB1;PIK3CD;PIK3R3;HRAS;KCNQ1;CREB3L1;CHRM1;CACNA1C;ADCY4;AKT1;PLCB2;ADCY9;ADCY7;PIK3R6;KCNJ12;GNGT2;PRKCA;GNG7;GNA11;CREB3L3;CACNA1A;PRKACA;AKT2;ITPR1;ADCY2;PIK3R1;KCNQ5;FYN;CREB5;CAMK2B;ADCY1;PIK3CG;ADCY8;KCNQ3
hsa04270	Vascular smooth muscle contraction	121	36	1.49	0.038947263	CALML6;PLA2G2F;CALML5;CALML3;MRVI1;GUCY1A2;CACNA1C;ADCY4;PLCB2;PLA2G4E;PLA2G4D;PLA2G4F;ADCY9;ADCY7;ADORA2B;PRKCA;ROCK1;GNA11;PRKACA;PPP1R14A;CALM3;PRKCE;ACTG2;MYL9;GNAS;PLA2G3;ITPR1;KCNMB3;ADCY2;MYLK4;GNA12;ADCY1;CALD1;BRAF;KCNU1;ADCY8
hsa04911	Insulin secretion	85	27	1.60	0.04028493	SLC2A1;ATP1A2;RYR2;CREB3L1;FXYD2;CACNA1C;PDX1;ADCY4;PLCB2;ADCY9;ADCY7;PRKCA;ADCYAP1;GNA11;CREB3L3;PRKACA;GNAS;SLC2A2;KCNMB3;ADCY2;KCNN2;ATF6B;CREB5;CAMK2B;ADCY1;KCNU1;ADCY8
hsa04071	Sphingolipid signaling pathway	118	35	1.49	0.043693723	PRKCZ;PIK3CD;PIK3R3;ADORA3;CERS2;FCER1G;ADORA1;PPP2R2D;HRAS;TNFRSF1A;BDKRB2;DEGS2;PPP2R5C;AKT1;PLCB2;ABCC1;PRKCA;ROCK1;S1PR4;ACER1;CERS4;S1PR5;CERS1;AKT2;PRKCE;SGPP2;MAPK12;PPP2R2C;SGMS2;PIK3R1;TNF;FYN;GNA12;NOS3;PPP2R2A
hsa05165	Human papillomavirus infection	339	86	1.27	0.043693723	ISG15;PRKCZ;HES3;PIK3CD;UBR4;WNT4;HDAC1;HEYL;PIK3R3;LAMB3;WNT9A;WNT3A;ITGB1;PARD3;PPP2R2D;HRAS;CREB3L1;TCIRG1;CCND1;FADD;DLG2;WNT5B;TNFRSF1A;CDKN1B;COL2A1;WNT1;CSNK1A1L;COL4A2;PPP2R5C;AKT1;THBS1;TSC2;PARD6A;LLGL1;TUBG2;WNT3;COL1A1;GRB2;ITGB4;LAMA3;CREB3L3;PRKACA;NOTCH3;COMP;AKT2;ATP6V1C2;FZD7;WNT6;COL4A3;COL6A3;HDAC4;GNAS;LAMA5;MX1;HDAC11;WNT7A;LAMB2;WNT5A;MAGI1;DVL3;PPP2R2C;RBPJ;TERT;PTGER4;PIK3…
hsa04978	Mineral absorption	51	18	1.77	0.043693723	ATP1A2;MT1HL1;FXYD2;HMOX2;MT2A;MT1M;MT1A;MT1G;MT1H;SLC46A1;TF;SLC34A2;SLC9A3;SLC6A19;STEAP1;TRPV6;SLC39A4;ATP7A
hsa05142	Chagas disease (American trypanosomiasis)	102	31	1.53	0.043693723	PIK3CD;C1QC;PIK3R3;JUN;PPP2R2D;FADD;TNFRSF1A;TGFB3;BDKRB2;AKT1;PLCB2;SMAD3;CCL2;CCL5;GNAL;GNA11;GNA15;CALR;AKT2;GNAS;MAPK12;TGFBR2;IL12A;PPP2R2C;PIK3R1;TNF;IL6;ADCY1;SERPINE1;PPP2R2A;TLR4
hsa04151	PI3K-Akt signaling pathway	354	89	1.26	0.047383332	GNB1;PIK3CD;EPHA2;CSF3R;PIK3R3;LPAR3;NGF;EFNA3;LAMB3;ITGB1;FGFR2;PPP2R2D;HRAS;IGF2;CREB3L1;CHRM1;CCND1;FGF3;FGF6;NTF3;LPAR5;CDKN1B;COL2A1;NR4A1;ERBB3;KITLG;COL4A2;PGF;PPP2R5C;AKT1;THBS1;TSC2;CD19;PIK3R6;GNGT2;NGFR;COL1A1;PRKCA;GRB2;ITGB4;RPTOR;LAMA3;EFNA2;GNG7;CREB3L3;JAK3;COMP;AKT2;COL4A3;COL6A3;PCK1;LAMA5;OSM;IL2RB;PDGFB;LAMB2;MAGI1;FGFR3;PPP2R2C;PDGFRA;OSMR;PIK3R1;F2R;FGF1;CSF1R;EIF4E1B;TNXB;A…
hsa05231	Choline metabolism in cancer	99	30	1.52	0.049653742	PIK3CD;WASF2;PIK3R3;JUN;SLC44A5;SLC44A3;HRAS;DGKZ;DGKA;AKT1;PLA2G4E;PLA2G4D;PLA2G4F;TSC2;PRKCA;GRB2;PIP5K1C;SLC44A2;AKT2;PDGFB;DGKG;PDGFRA;PIK3R1;SLC44A4;SLC22A2;PDGFA;EGFR;LYPLA1;SLC44A1;WAS
LSCC: Over-representation analysis of DMR-containing genes
GeneSet	Description	Size	Count	enrichmentRatio	FDR	Genes affected
hsa04080	Neuroactive ligand-receptor interaction	277	57	2.73	3.74E-10	GABRD;HTR6;GRIK3;LEPR;GRID1;PRLHR;DRD4;FSHB;MTNR1B;GRIA4;GRIK4;EDNRB;SSTR1;GABRB3;GABRA5;GABRG3;GRIN2A;GRIK5;GRIN2D;FPR2;NTSR2;FSHR;SCTR;GPR35;NPBWR2;THRB;GABRR3;DRD3;AGTR1;GHSR;DRD5;GABRG1;GRID2;EDNRA;NPY2R;RXFP3;HTR1A;GRIA1;GABRB2;GABRA6;GABRA1;GRM6;GABBR1;GRM4;HTR1B;CNR1;GRIK2;TAAR8;TAAR6;NMBR;GRM1;ADCYAP1R1;GRM3;VIPR2;ADRA1A;CHRNA6;HTR2C
hsa05033	Nicotine addiction	40	16	5.30	1.68E-06	GABRD;GRIA4;GABRB3;GABRA5;GABRG3;GRIN2A;CACNA1A;GRIN2D;SLC32A1;GABRR3;GABRG1;GRIA1;GABRB2;GABRA6;GABRA1;CHRNA6
hsa04740	Olfactory transduction	448	67	1.98	2.84E-06	OR10Z1;OR6K6;OR2B11;OR1C1;OR11L1;OR2M5;OR2M3;OR2T12;OR2T27;OR13A1;OR52M1;OR51D1;OR51F1;OR51F2;OR51Q1;OR51I2;OR52E8;OR10A2;OR4B1;OR4S1;OR4C12;OR4A15;OR4S2;OR5L2;OR8H2;OR8K3;OR5AR1;OR9I1;OR10W1;OR5B17;OR5B2;OR5AN1;OR5A1;OR4D10;OR2AT4;OR6M1;OR8D4;OR8B3;OR8B8;OR8A1;OR6C4;OR5AU1;OR10G2;OR4E2;SLC8A3;SLC24A4;OR4F6;OR1F1;OR1G1;OR1E1;GUCY2D;OR2Z1;OR1M1;OR7C2;OR10H2;SLC8A1;CNGA3;OR2J2;OR12D3;OR12D2;OR10C1;…
hsa05032	Morphine addiction	91	21	3.06	2.26E-04	GABRD;PDE4B;GNG4;PDE3A;GABRB3;GABRA5;GABRG3;CACNA1A;KCNJ3;SLC32A1;GABRR3;GABRG1;ADCY2;GABRB2;GABRA6;GABRA1;GABBR1;PDE10A;PDE1C;GNGT1;ADCY8
hsa04950	Maturity onset diabetes of the young	26	10	5.09	5.76E-04	PKLR;NR5A2;PAX6;PDX1;ONECUT1;HNF1B;NKX2-2;NKX6-1;MNX1;MAFA
hsa04724	Glutamatergic synapse	114	23	2.67	5.76E-04	GRIK3;SLC1A7;GNG4;SHANK2;GRIA4;GRIK4;CACNA1C;GRIN2A;CACNA1A;SLC1A6;GRIK5;GRIN2D;SHANK1;KCNJ3;ADCY2;GRIA1;GRM6;GRM4;GRIK2;GRM1;GRM3;GNGT1;ADCY8
hsa04024	cAMP signaling pathway	199	33	2.20	5.80E-04	HTR6;PDE4B;ATP1A4;BDNF;FSHB;GRIA4;CACNA1C;PDE3A;SSTR1;GRIN2A;SOX9;ROCK1;AMH;CREB3L3;GRIN2D;FSHR;CNGA3;GHSR;ACOX3;DRD5;EDNRA;ADCY2;HTR1A;GRIA1;GABBR1;HTR1B;PDE10A;ADCYAP1R1;GLI3;CAMK2B;VIPR2;ADCY8;ATP2B3
hsa04727	GABAergic synapse	88	19	2.86	9.29E-04	GABRD;GNG4;CACNA1C;GABRB3;GABRA5;GABRG3;CACNA1A;SLC32A1;SLC12A5;SLC6A1;GABRR3;GABRG1;ADCY2;GABRB2;GABRA6;GABRA1;GABBR1;GNGT1;ADCY8
hsa04742	Taste transduction	83	17	2.71	0.004441339	TAS1R2;HTR3B;CACNA1C;GABRA5;ASIC2;CACNA1A;HTR1A;GABRA6;GABRA1;GABBR1;GRM4;HTR1B;GRM1;PDE1C;TAS2R16;TAS2R40;ADCY8
hsa04020	Calcium signaling pathway	183	26	1.88	0.039902612	HTR6;CACNA1E;CACNA1C;EDNRB;SLC8A3;CACNA1H;GRIN2A;GNA11;GNA15;CACNA1A;RYR1;GRIN2D;SLC8A1;ERBB4;AGTR1;DRD5;EDNRA;ADCY2;MYLK4;GRM1;PDE1C;CAMK2B;ADRA1A;ADCY8;HTR2C;ATP2B3
hsa04723	Retrograde endocannabinoid signaling	148	22	1.97	0.046832084	GABRD;GNG4;GRIA4;CACNA1C;GABRB3;GABRA5;GABRG3;CACNA1A;KCNJ3;SLC32A1;GABRR3;GABRG1;ADCY2;GRIA1;GABRB2;GABRA6;GABRA1;RIMS1;CNR1;GRM1;GNGT1;ADCY8
OSCC: Over-representation analysis of DMR-containing genes
GeneSet	Description	Size	Count	enrichmentRatio	FDR	Genes affected
hsa04080	Neuroactive ligand-receptor interaction	277	54	2.61	8.61E-09	LEPR;PTGFR;ADORA3;GRID1;PRLHR;MTNR1B;GRIA4;DRD2;GRIK4;GRIN2B;AVPR1A;MLNR;EDNRB;SSTR1;PTGDR;GABRA5;GABRG3;GRIN2A;GALR1;GRIK5;GRIN2D;SCTR;SSTR4;GRIK1;PTH1R;AGTR1;GHSR;DRD5;GABRA2;NPFFR2;TACR3;NPY2R;GRIA2;NPY5R;GLRA3;RXFP3;HTR1A;F2R;HTR4;GLRA1;GABRA1;GRM6;GABBR1;HTR1B;GRIK2;NMBR;GRM1;OPRM1;CRHR2;ADCYAP1R1;GRM8;CHRM2;HTR5A;HTR2C
hsa04724	Glutamatergic synapse	114	27	3.18	7.39E-06	GNG4;SLC17A6;SHANK2;GRIA4;GRIK4;CACNA1C;GRIN2B;GRIN2A;PRKCB;GNG7;SLC1A6;GRIK5;GRIN2D;PRKCG;ADCY3;KCNJ3;PLCB1;GNAS;GRIK1;GRIA2;ADCY2;GRM6;GRIK2;GRM1;GNB2;GRM8;ADCY8
hsa04024	cAMP signaling pathway	199	36	2.43	4.80E-05	PDE4B;RYR2;BDNF;RELA;PPP1CA;PAK1;GRIA4;DRD2;CACNA1C;GRIN2B;SSTR1;AKT1;GRIN2A;ROCK1;CREB3L3;PDE4C;GRIN2D;ADCY3;CNGA3;GNAS;GHSR;ACOX3;DRD5;GRIA2;ADCY2;HTR1A;F2R;HTR4;GABBR1;HTR1B;PDE10A;ADCYAP1R1;GLI3;CFTR;CHRM2;ADCY8
hsa04950	Maturity onset diabetes of the young	26	11	5.67	8.06E-05	NR5A2;NEUROG3;PAX6;PDX1;ONECUT1;HNF1B;NKX2-2;FOXA2;NKX6-1;PAX4;MNX1
hsa05032	Morphine addiction	91	21	3.09	1.48E-04	PDE4B;GNG4;GABRA5;GABRG3;PRKCB;GNG7;PDE4C;PRKCG;ADCY3;KCNJ3;SLC32A1;GNAS;GABRA2;ADCY2;GABRA1;GABBR1;OPRM1;PDE10A;PDE1C;GNB2;ADCY8
hsa04713	Circadian entrainment	96	21	2.93	3.06E-04	GNG4;RYR2;MTNR1B;GRIA4;CACNA1C;GRIN2B;CACNA1H;GRIN2A;PRKCB;GNG7;GRIN2D;PRKCG;ADCY3;KCNJ3;PLCB1;GNAS;GRIA2;ADCY2;ADCYAP1R1;GNB2;ADCY8
hsa04928	Parathyroid hormone synthesis. secretion and action	106	21	2.66	0.001106471	PDE4B;GATA3;LRP5;PTHLH;KL;PRKCB;SOST;GNA11;CREB3L3;PDE4C;PRKCG;ADCY3;PLCB1;GNAS;PTH1R;ADCY2;GCM2;RXRB;GNA12;ADCY8;RXRA
hsa04728	Dopaminergic synapse	131	24	2.46	0.001106471	GNG4;SLC18A2;PPP2R2D;PPP1CA;GRIA4;DRD2;CACNA1C;GRIN2B;AKT1;GRIN2A;PRKCB;GNG7;CREB3L3;PRKCG;KIF5C;KCNJ3;PLCB1;GNAS;DRD5;GRIA2;SLC6A3;DDC;GNB2;PPP2R2A
hsa04020	Calcium signaling pathway	183	30	2.20	0.001106471	PTGFR;CACNA1E;ITPKB;RYR2;CACNA1C;AVPR1A;EDNRB;CACNA1H;GRIN2A;PRKCB;GNA11;GRIN2D;SPHK2;PRKCG;ADCY3;ERBB4;PLCB1;GNAS;AGTR1;DRD5;TACR3;ADCY2;F2R;HTR4;GRM1;PDE1C;CHRM2;HTR5A;ADCY8;HTR2C
hsa04727	GABAergic synapse	88	18	2.74	0.002200656	GNG4;GAD2;CACNA1C;GABARAPL1;GABRA5;GABRG3;PRKCB;GNG7;PRKCG;ADCY3;SLC32A1;SLC12A5;GABRA2;ADCY2;GABRA1;GABBR1;GNB2;ADCY8
hsa05031	Amphetamine addiction	68	15	2.96	0.003069596	SLC18A2;PPP1CA;GRIA4;CACNA1C;GRIN2B;GRIN2A;PRKCB;CREB3L3;GRIN2D;PRKCG;GNAS;GRIA2;SLC6A3;DDC;STX1A
hsa05033	Nicotine addiction	40	11	3.69	0.003069596	SLC17A6;GRIA4;GRIN2B;GABRA5;GABRG3;GRIN2A;GRIN2D;SLC32A1;GABRA2;GRIA2;GABRA1
hsa04911	Insulin secretion	85	17	2.68	0.003592462	RYR2;CACNA1C;PDX1;PRKCB;ADCYAP1;GNA11;CREB3L3;TRPM4;PRKCG;ADCY3;PLCB1;GNAS;ADCY2;KCNN2;ADCYAP1R1;STX1A;ADCY8
hsa04072	Phospholipase D signaling pathway	146	24	2.20	0.004077919	MTOR;PTGFR;AVPR1A;AKT1;PIK3R6;DNM2;SPHK2;ADCY3;DGKD;PLCB1;GNAS;CYTH4;AGTR1;DGKG;ADCY2;F2R;GRM6;AGPAT1;GRM1;GNA12;GRM8;DGKI;ADCY8;DGKK
hsa05030	Cocaine addiction	49	12	3.28	0.004077919	SLC18A2;BDNF;RELA;DRD2;GRIN2B;GRIN2A;CREB3L3;GRIN2D;GNAS;GRIA2;SLC6A3;DDC
hsa04723	Retrograde endocannabinoid signaling	148	23	2.08	0.011444312	GNG4;SLC17A6;GRIA4;CACNA1C;NDUFA12;GABRA5;GABRG3;PRKCB;GNG7;NDUFA13;PRKCG;ADCY3;KCNJ3;PLCB1;SLC32A1;NDUFB4;GABRA2;GRIA2;ADCY2;GABRA1;GRM1;GNB2;ADCY8
hsa05412	Arrhythmogenic right ventricular cardiomyopathy (ARVC)	72	14	2.61	0.014078381	LMNA;RYR2;ITGA8;ACTN3;CACNA1C;CACNG3;JUP;CACNG5;CACNG7;CACNG8;CTNNA2;ITGA4;DES;SGCD
hsa05414	Dilated cardiomyopathy (DCM)	90	16	2.38	0.016052893	LMNA;RYR2;ITGA8;CACNA1C;MYH7;CACNG3;CACNG5;CACNG7;CACNG8;ADCY3;ITGA4;DES;GNAS;ADCY2;SGCD;ADCY8
hsa00910	Nitrogen metabolism	17	6	4.73	0.01744223	CA7;CA4;CA8;CA1;CA3;GLUD2
hsa04725	Cholinergic synapse	112	18	2.16	0.024014967	GNG4;CHAT;SLC18A3;CACNA1C;AKT1;PRKCB;PIK3R6;GNG7;GNA11;CREB3L3;PRKCG;ADCY3;KCNJ3;PLCB1;ADCY2;GNB2;CHRM2;ADCY8
hsa04726	Serotonergic synapse	115	18	2.10	0.031065881	GNG4;SLC18A2;CACNA1C;PRKCB;GNG7;PRKCG;KCNJ3;PLCB1;GNAS;HTR1A;KCNN2;HTR4;DUSP1;HTR1B;DDC;GNB2;HTR5A;HTR2C
hsa04927	Cortisol synthesis and secretion	64	12	2.51	0.035401353	KCNA4;CACNA1C;CACNA1H;GNA11;CREB3L3;ADCY3;PLCB1;GNAS;AGTR1;ADCY2;ADCY8;CYP11B1
OPSCC: Over-representation analysis of DMR-containing genes
GeneSet	Description	Size	Count	enrichmentRatio	FDR	Genes affected
hsa04020	Calcium signaling pathway	183	73	1.71	9.95E-05	CALML6;HTR6;CACNA1E;ATP2B4;RYR2;CALML5;CALML3;TACR2;CHRM1;PLCB3;CACNA1C;PDE1B;HTR2A;EDNRB;LTB4R2;ADCY4;SLC8A3;CHRNA7;CHRM5;PLCB2;CACNA1H;ADCY9;GRIN2A;PRKCB;ATP2A1;ADCY7;PLCG2;ATP2A3;CACNA1G;GNA15;TBXA2R;CACNA1A;PRKACA;RYR1;CALM3;SLC8A2;GRIN2D;ADCY3;TACR1;PDE1A;PLCD4;MYLK2;GNAS;NTSR1;CACNA1I;ITPR1;OXTR;ATP2B2;HRH1;CACNA1D;MYLK;AGTR1;DRD5;CD38;STIM2;PDGFRA;SLC25A31;SLC25A4;ADCY2;HTR4;HRH2;MYLK4;ITP…
hsa04024	cAMP signaling pathway	199	77	1.66	1.01E-04	CALML6;PIK3CD;HTR6;HTR1D;PDE4B;ATP1A1;ATP1A2;ATP2B4;RYR2;AKT3;CALML5;CALML3;CNGA4;BDNF;FSHB;CHRM1;RELA;PPP1CA;CACNA1C;GRIN2B;ADCY4;SSTR1;HCN4;CREBBP;ADCY9;GRIN2A;ADCY7;PPP1R1B;SOX9;ROCK1;NFATC1;HCN2;GRIN3B;PRKACA;PIK3R2;FXYD1;FFAR2;CALM3;GRIN2D;TNNI3;ADCY3;FSHR;CNGA3;CREB1;GNAS;TIAM1;EP300;OXTR;ATP2B2;RHOA;GNAI2;CACNA1D;GHSR;ACOX3;DRD5;GRIA2;ADCY2;PDE4D;HTR1A;PIK3R1;HTR4;MAPK9;GABBR1;HTR1B;PDE10A…
hsa04921	Oxytocin signaling pathway	152	62	1.75	1.05E-04	CALML6;RYR2;CALML5;CALML3;CACNB2;PLCB3;PPP1CA;CCND1;CACNA2D4;CACNA1C;KRAS;PRKAB1;ADCY4;PLCB2;PLA2G4E;PLA2G4D;PLA2G4F;ADCY9;EEF2K;PRKCB;CACNG3;ADCY7;GNAO1;PIK3R6;PIK3R5;KCNJ12;CACNG5;CACNG4;CACNG1;ROCK1;NFATC1;PRKACA;RYR1;CALM3;KCNJ14;CACNG7;CACNG8;ADCY3;MYLK2;SRC;NFATC2;GNAS;TRPM2;ITPR1;OXTR;RHOA;GNAI2;CACNA1D;MYLK;CD38;ADCY2;MEF2C;MYLK4;ITPR3;CDKN1A;CAMK2B;ADCY1;PIK3CG;NOS3;PRKAG2;PPP3CC;ADCY8
hsa04611	Platelet activation	123	52	1.81	1.66E-04	PRKCZ;PIK3CD;AKT3;APBB1IP;ITGB1;FERMT3;PLCB3;RASGRP2;PPP1CA;VWF;ADCY4;RASGRP1;PLCB2;PLA2G4E;PLA2G4D;PLA2G4F;ADCY9;ADCY7;PLCG2;PIK3R6;PIK3R5;ITGB3;COL1A1;MYL12B;ROCK1;TBXA2R;PRKACA;PIK3R2;ARHGEF1;GP6;ADCY3;MYLK2;SRC;GNAS;ITPR1;RHOA;GNAI2;MYLK;PRKG2;ADCY2;PIK3R1;MYLK4;ITPR3;FYN;ADCY1;COL1A2;PIK3CG;TBXAS1;NOS3;ADCY8;SYK;PTGS1
hsa04261	Adrenergic signaling in cardiomyocytes	144	57	1.70	4.92E-04	CALML6;ATP1A1;ATP1A2;TNNT2;ATP2B4;RYR2;AKT3;CALML5;CALML3;CACNB2;PPP2R2D;KCNQ1;PLCB3;PPP1CA;SCN4B;CACNA2D4;CACNA1C;MYL2;MYH7;ADCY4;PPP2R5C;ACTC1;PLCB2;ADCY9;CACNG3;ADCY7;PIK3R6;PIK3R5;CACNG5;CACNG4;CACNG1;PRKACA;TPM4;CALM3;CACNG7;CACNG8;TNNI3;ADCY3;SCN7A;CREB1;GNAS;KCNE1;ATP2B2;MYL3;GNAI2;CACNA1D;AGTR1;PPP2R2C;ADCY2;PPP2R2B;ATF6B;CREB5;CAMK2B;ADCY1;PIK3CG;PPP2R2A;ADCY8
hsa04927	Cortisol synthesis and secretion	64	31	2.08	4.92E-04	PBX1;CYP17A1;KCNA4;PLCB3;CACNA1C;SCARB1;ADCY4;PLCB2;CYP11A1;CACNA1H;ADCY9;ADCY7;CACNA1G;LDLR;PRKACA;ADCY3;CREB1;GNAS;CACNA1I;ITPR1;CACNA1D;AGTR1;NCEH1;ADCY2;CYP21A2;ATF6B;ITPR3;CREB5;ADCY1;ADCY8;CYP11B1
hsa04976	Bile secretion	71	33	1.99	5.90E-04	NR0B2;ATP1A1;ATP1A2;EPHX1;ABCC2;SLC22A8;SLCO1B3;NR1H4;SCARB1;ADCY4;AQP9;ADCY9;AQP8;ADCY7;ABCC3;LDLR;PRKACA;SULT2A1;ADCY3;ABCG5;SCTR;GNAS;SLC5A1;NCEH1;SLC51A;SLC4A4;SLC9A3;ADCY2;KCNN2;ADCY1;ABCB1;ADCY8;RXRA
hsa04022	cGMP-PKG signaling pathway	163	62	1.63	5.90E-04	CALML6;NPPB;ADORA3;ATP1A1;ATP1A2;ATP2B4;AKT3;CALML5;CALML3;INS;PLCB3;PPP1CA;CACNA1C;EDNRB;MYH7;ADCY4;SLC8A3;PLCB2;ADCY9;ATP2A1;ADCY7;ATP2A3;PIK3R6;PIK3R5;ROCK1;NFATC1;INSR;MEF2B;CALM3;SLC8A2;ADCY3;PRKCE;CREB1;MYLK2;NFATC2;ITPR1;ATP2B2;RHOA;GNAI2;CACNA1D;MYLK;AGTR1;ADRA2C;PRKG2;SLC25A31;SLC25A4;ADCY2;MEF2C;MYLK4;ATF6B;ITPR3;SRF;GNA12;CREB5;ADCY1;GTF2I;PIK3CG;NOS3;GATA4;PPP3CC;KCNU1;ADCY8
hsa05030	Cocaine addiction	49	25	2.19	7.78E-04	TH;BDNF;RELA;GRIN2B;GRIN2A;DLG4;PPP1R1B;RGS9;GRIN3B;PRKACA;FOSB;GRIN2D;CREB1;GNAS;GNAI2;GRM2;GRIA2;SLC6A3;ATF6B;CREB5;DDC;SLC18A1;GRIN3A;GPSM1;MAOB
hsa04750	Inflammatory mediator regulation of TRP channels	99	41	1.78	0.001224427	CALML6;PIK3CD;NGF;CALML5;CALML3;PRKCQ;PLCB3;PPP1CA;HTR2A;ADCY4;PLCB2;PLA2G4E;PLA2G4D;PLA2G4F;ADCY9;PRKCB;ADCY7;PLCG2;TRPV1;MAP2K3;ASIC2;PRKACA;PIK3R2;CALM3;ADCY3;PRKCE;ASIC4;SRC;GNAS;PLA2G6;ITPR1;HRH1;ADCY2;PIK3R1;MAPK9;ITPR3;CAMK2B;ADCY1;ASIC3;ADCY8;HTR2C
hsa04015	Rap1 signaling pathway	206	73	1.52	0.001224427	CALML6;PRKCZ;PIK3CD;RAP1GAP;NGF;EFNA4;RASSF5;AKT3;CALML5;CALML3;APBB1IP;ITGB1;PARD3;INS;PLCB3;RASGRP2;SIPA1;FGF19;FGF3;FGF23;FGF6;GRIN2B;KRAS;FGF9;FLT1;ADCY4;PRKD1;THBS1;PLCB2;IGF1R;ADCY9;GRIN2A;PRKCB;LAT;ITGAL;ADCY7;GNAO1;CDH1;MAP2K3;ITGB3;SKAP1;EFNA2;INSR;PIK3R2;SIPA1L3;CALM3;ADCY3;RALB;FARP2;ANGPT4;SRC;PARD6B;GNAS;TIAM1;RHOA;GNAI2;FGFR3;PDGFRA;FGF5;ADCY2;PIK3R1;FGF1;CSF1R;FGF18;FGFR4;FLT4;VEGF…
hsa04713	Circadian entrainment	96	40	1.79	0.001224427	CALML6;GNG4;RYR2;CALML5;CALML3;PLCB3;CACNA1C;GRIN2B;ADCY4;PLCB2;CACNA1H;ADCY9;GRIN2A;PRKCB;ADCY7;GNAO1;PER1;CACNA1G;GNG7;PRKACA;RYR1;CALM3;GRIN2D;ADCY3;CREB1;PER2;GNAS;CACNA1I;ITPR1;GNAI2;CACNA1D;PRKG2;GRIA2;MTNR1A;ADCY2;ITPR3;ADCYAP1R1;CAMK2B;ADCY1;ADCY8
hsa05414	Dilated cardiomyopathy (DCM)	90	38	1.81	0.001228816	TNNT2;RYR2;ITGA8;CACNB2;ITGB1;MYBPC3;CACNA2D4;CACNA1C;ITGA7;MYL2;SGCG;MYH7;ADCY4;ACTC1;ADCY9;CACNG3;ADCY7;ITGB3;CACNG5;CACNG4;CACNG1;PRKACA;TPM4;CACNG7;CACNG8;TNNI3;ADCY3;TTN;ITGA4;GNAS;MYL3;DAG1;CACNA1D;ADCY2;SGCD;ADCY1;ADCY8;DMD
hsa04725	Cholinergic synapse	112	44	1.69	0.002108263	PIK3CD;GNG4;AKT3;CHAT;KCNQ1;CHRM1;PLCB3;CACNA1C;KRAS;ADCY4;CHRNA7;CHRM5;PLCB2;CHRNA3;ADCY9;PRKCB;ADCY7;GNAO1;PIK3R6;PIK3R5;KCNJ12;GNG7;CACNA1A;PRKACA;PIK3R2;KCNJ14;ADCY3;CREB1;CHRNA4;KCNQ2;ITPR1;GNAI2;CACNA1D;ADCY2;PIK3R1;ITPR3;FYN;CREB5;CAMK2B;ADCY1;PIK3CG;CHRM2;ADCY8;KCNQ3
hsa04014	Ras signaling pathway	232	79	1.46	0.002108263	CALML6;PIK3CD;PLA2G2E;PLA2G5;NGF;SHC1;EFNA4;RASAL2;RASSF5;GNG4;AKT3;CALML5;CALML3;PLA2G12B;IGF2;INS;BDNF;RASGRP2;RELA;FGF19;FGF3;ETS1;FGF23;FGF6;NTF3;GRIN2B;KRAS;TBK1;KSR2;FGF9;FLT1;RASA3;RASGRP1;PAK6;PLA2G4E;PLA2G4D;PLA2G4F;RASGRF1;IGF1R;GRIN2A;PRKCB;LAT;PLCG2;SHC2;EFNA2;GNG7;INSR;PRKACA;PIK3R2;PAK4;CALM3;ZAP70;RALB;ANGPT4;TIAM1;PLA2G3;PLA2G6;RAB5A;RHOA;RASSF1;RASA2;FGFR3;PDGFRA;FGF5;PIK3R1;FGF1…
hsa04925	Aldosterone synthesis and secretion	96	39	1.74	0.002108263	CALML6;ATP1A1;ATP1A2;ATP2B4;CALML5;CALML3;PLCB3;CACNA1C;SCARB1;ADCY4;PRKD1;PLCB2;CYP11A1;CACNA1H;ADCY9;PRKCB;ADCY7;CACNA1G;LDLR;PRKACA;CALM3;ADCY3;PRKCE;CREB1;GNAS;CACNA1I;ITPR1;ATP2B2;CACNA1D;AGTR1;ADCY2;CYP21A2;ATF6B;ITPR3;CREB5;CAMK2B;ADCY1;ADCY8;KCNK9
hsa04918	Thyroid hormone synthesis	74	32	1.86	0.002108263	ATP1A1;ATP1A2;PLCB3;ADCY4;GPX2;PLCB2;DUOX2;DUOXA2;ADCY9;PRKCB;ADCY7;ASGR1;PRKACA;TPO;ADCY3;PAX8;LRP2;CREB1;GNAS;ITPR1;ADCY2;CANX;GPX6;GPX5;ATF6B;ITPR3;CREB5;ADCY1;SLC26A4;PDIA4;ADCY8;TG
hsa04080	Neuroactive ligand-receptor interaction	277	91	1.41	0.002564968	GABRD;HTR6;HTR1D;CNR2;GRIK3;LEPR;S1PR1;ADORA3;PARD3;TACR2;DRD4;FSHB;CHRM1;P2RY6;GRIK4;GRIN2B;HTR2A;EDNRB;LTB4R2;SSTR1;GABRB3;GABRG3;CHRNA7;CHRM5;CHRNA3;GRIN2A;MC1R;TRPV1;GLP2R;THRA;GH2;GH1;GALR1;GRIN3B;TBXA2R;P2RY11;GRIK5;GRIN2D;FPR2;NTSR2;FSHR;TACR1;SCTR;CHRNA1;PTH2R;GPR35;MC3R;NTSR1;CHRNA4;OPRL1;NPBWR2;SSTR3;GALR3;OXTR;HRH1;PTH1R;GRM2;DRD3;AGTR1;GHSR;ADRA2C;DRD5;GRID2;GRIA2;MTNR1A;RXFP3;PRLR;HT…
hsa04971	Gastric acid secretion	75	32	1.83	0.002564968	CALML6;ATP1A1;ATP1A2;CALML5;CALML3;KCNQ1;PLCB3;KCNJ1;ATP4B;ADCY4;PLCB2;ADCY9;PRKCB;ADCY7;PRKACA;ATP4A;CALM3;ADCY3;MYLK2;GNAS;ITPR1;GNAI2;MYLK;SST;ADCY2;HRH2;MYLK4;ITPR3;EZR;CAMK2B;ADCY1;ADCY8
hsa04724	Glutamatergic synapse	114	44	1.66	0.002722803	GRIK3;SLC1A7;GNG4;PLCB3;SHANK2;GRIK4;CACNA1C;GRIN2B;ADCY4;PLCB2;PLA2G4E;PLA2G4D;PLA2G4F;ADCY9;GRIN2A;PRKCB;ADCY7;GNAO1;DLG4;GRIN3B;GNG7;CACNA1A;PRKACA;GRIK5;GRIN2D;SHANK1;ADCY3;GNAS;ITPR1;GNAI2;GRM2;CACNA1D;GRIA2;ADCY2;HOMER1;GRM6;ITPR3;GRM4;GRIK2;GRM1;ADCY1;PPP3CC;ADCY8;GRIN3A
hsa04930	Type II diabetes mellitus	46	22	2.05	0.003455199	PRKCZ;PIK3CD;MTOR;PKLR;CACNA1E;HKDC1;HK1;INS;CACNA1C;SOCS2;PDX1;SOCS1;CACNA1G;INSR;CACNA1A;PIK3R2;PRKCE;CACNA1D;ADIPOQ;PIK3R1;HK3;MAPK9
hsa04913	Ovarian steroidogenesis	49	23	2.01	0.003455199	ALOX5;CYP17A1;INS;FSHB;SCARB1;ADCY4;PLA2G4E;PLA2G4D;PLA2G4F;CYP11A1;IGF1R;ADCY9;ADCY7;INSR;LDLR;PRKACA;ADCY3;FSHR;GNAS;ADCY2;BMP6;ADCY1;ADCY8
hsa04928	Parathyroid hormone synthesis. secretion and action	106	41	1.66	0.003698847	PDE4B;GATA3;PLCB3;LRP5;MMP13;FGF23;MMP17;MMP14;ADCY4;PLCB2;ADCY9;PRKCB;ADCY7;MMP15;SOST;PRKACA;ARHGEF1;ADCY3;CREB1;GNAS;ITPR1;PTH1R;RHOA;GNAI2;SLC34A2;ADCY2;PDE4D;MEF2C;ATF6B;RXRB;ITPR3;CDKN1A;RUNX2;GNA12;CREB5;ADCY1;BRAF;MMP16;ADCY8;RXRA;SLC34A3
hsa04934	Cushing syndrome	154	55	1.53	0.003965293	DVL1;WNT4;PBX1;WNT3A;WNT8B;CYP17A1;KCNA4;PLCB3;CCND1;WNT11;CACNA1C;SCARB1;FZD10;ADCY4;PLCB2;CYP11A1;CACNA1H;ADCY9;ARMC5;ADCY7;AIPL1;WNT3;CACNA1G;LDLR;PRKACA;CCNE1;ADCY3;CREB1;FZD5;WNT6;GNAS;CACNA1I;ITPR1;WNT7A;GNAI2;CACNA1D;WNT5A;AGTR1;NCEH1;DVL3;ADCY2;APC;CYP21A2;ATF6B;ITPR3;CDKN1A;CREB5;CRHR2;CAMK2B;ADCY1;CDK6;BRAF;FZD6;ADCY8;CYP11B1
hsa05031	Amphetamine addiction	68	29	1.83	0.003965293	CALML6;CALML5;CALML3;TH;PPP1CA;CACNA1C;GRIN2B;GRIN2A;PRKCB;PPP1R1B;GRIN3B;PRKACA;FOSB;CALM3;GRIN2D;CREB1;GNAS;CACNA1D;GRIA2;SLC6A3;ATF6B;CREB5;CAMK2B;DDC;SLC18A1;PPP3CC;ARC;GRIN3A;MAOB
hsa04916	Melanogenesis	101	39	1.66	0.004767773	DVL1;CALML6;WNT4;WNT3A;CALML5;CALML3;WNT8B;PLCB3;WNT11;KRAS;FZD10;EDNRB;ADCY4;PLCB2;CREBBP;ADCY9;PRKCB;ADCY7;GNAO1;MC1R;WNT3;PRKACA;CALM3;ADCY3;CREB1;FZD5;WNT6;GNAS;EP300;WNT7A;GNAI2;WNT5A;MITF;DVL3;ADCY2;CAMK2B;ADCY1;FZD6;ADCY8
hsa04072	Phospholipase D signaling pathway	146	52	1.53	0.005471147	PIK3CD;MTOR;SHC1;AKT3;INS;DGKZ;MS4A2;PLCB3;KRAS;ADCY4;PLCB2;PLA2G4E;PLA2G4D;PLA2G4F;TSC2;ADCY9;ADCY7;PLCG2;PIK3R6;PIK3R5;CYTH1;PLPP2;SHC2;INSR;PIK3R2;ADCY3;RALB;CXCR1;DGKD;GNAS;AGPAT3;RHOA;GRM2;AGTR1;DGKG;PDGFRA;ADCY2;PLPP1;PIK3R1;GRM6;AGPAT1;GRM4;FYN;GRM1;AGPAT4;PDGFA;GNA12;ADCY1;PIK3CG;AGPAT5;ADCY8;SYK
hsa04310	Wnt signaling pathway	146	52	1.53	0.005471147	DVL1;CTNNBIP1;WNT4;VANGL2;WNT3A;SFRP5;WNT8B;BTRC;CTBP2;PLCB3;LRP5;CCND1;WNT11;CCND2;PRICKLE1;FZD10;CSNK1A1L;PLCB2;SMAD3;CREBBP;PRKCB;NKD1;SERPINF1;SOST;WNT3;NOTUM;NFATC1;PRKACA;FZD5;WNT6;CSNK2A1;NFATC2;CSNK1E;EP300;WNT7A;RHOA;WNT5A;DVL3;CTBP1;SFRP2;NKD2;APC;FBXW11;MAPK9;CSNK2B;MAP3K7;SFRP4;CAMK2B;PPP3CC;SOX17;FZD6;PORCN
hsa04371	Apelin signaling pathway	137	49	1.53	0.006698657	CALML6;MTOR;GNG4;RYR2;AKT3;CALML5;CALML3;PLCB3;CCND1;GABARAPL1;KRAS;MYL2;PRKAB1;ADCY4;SLC8A3;PLCB2;SMAD3;ADCY9;ADCY7;CDH1;PIK3R6;PIK3R5;GNG7;PRKACA;KLF2;MEF2B;RYR1;CALM3;SLC8A2;ADCY3;PRKCE;HDAC4;MYLK2;ITPR1;MYL3;GNAI2;MYLK;PIK3R4;AGTR1;ADCY2;MEF2C;MYLK4;ITPR3;ADCY1;PIK3CG;NOS3;PRKAG2;PLAT;ADCY8
hsa04514	Cell adhesion molecules (CAMs)	144	51	1.52	0.006698657	NEGR1;CD58;VTCN1;SELE;NFASC;CNTN2;CD34;ITGA8;ITGB1;LRRC4C;CD6;NRXN2;NCAM1;CADM1;NECTIN1;JAM3;CLDN10;NRXN3;NEO1;CLDN9;SPN;ITGAL;CDH5;CDH3;CDH1;CDH15;ICAM2;ICAM3;MAG;CD22;LRRC4B;ITGA4;SDC4;CDH4;CLDN8;CLDN18;CLDN11;OCLN;HLA-F;HLA-G;HLA-E;HLA-C;HLA-DQA2;HLA-DOB;HLA-DMB;HLA-DOA;HLA-DPA1;HLA-DPB1;CNTNAP2;SDC2;NLGN3
hsa04950	Maturity onset diabetes of the young	26	14	2.31	0.007498426	PKLR;NR5A2;HHEX;INS;PAX6;PDX1;ONECUT1;HNF1B;NKX2-2;FOXA2;HNF4A;HES1;NKX6-1;MNX1
hsa04510	Focal adhesion	199	66	1.42	0.008723043	PIK3CD;SHC1;TNR;LAMC2;LAMB3;CAPN2;AKT3;ITGA8;ITGB1;PPP1CA;CCND1;BIRC3;CCND2;VWF;COL2A1;ITGA7;MYL2;FLT1;COL4A1;COL4A2;THBS1;PAK6;RASGRF1;IGF1R;PRKCB;ITGB3;COL1A1;MYL12B;ROCK1;LAMA3;SHC2;PIK3R2;ACTN4;PAK4;ITGA4;FN1;MYLK2;SRC;LAMA5;PARVB;LAMB2;RHOA;MYLK;COL6A5;MYL5;PDGFRA;PIK3R1;MAPK9;FLT4;MYLK4;TNXB;VEGFA;COL9A1;FYN;THBS2;PDGFA;MYL7;HGF;COL1A2;MYL10;CAV2;FLNC;BRAF;COL4A6;PAK3;FLNA
hsa05410	Hypertrophic cardiomyopathy (HCM)	83	32	1.65	0.012542506	TNNT2;RYR2;ITGA8;CACNB2;ITGB1;MYBPC3;CACNA2D4;CACNA1C;ITGA7;MYL2;PRKAB1;SGCG;MYH7;ACTC1;CACNG3;ITGB3;ACE;CACNG5;CACNG4;CACNG1;TPM4;CACNG7;CACNG8;TNNI3;TTN;ITGA4;MYL3;DAG1;CACNA1D;SGCD;PRKAG2;DMD
hsa04720	Long-term potentiation	67	27	1.73	0.013241809	CALML6;RPS6KA1;CALML5;CALML3;PLCB3;PPP1CA;CACNA1C;GRIN2B;KRAS;PLCB2;CREBBP;GRIN2A;PRKCB;PRKACA;CALM3;GRIN2D;EP300;ITPR1;GRIA2;ITPR3;GRM1;RPS6KA2;CAMK2B;ADCY1;BRAF;PPP3CC;ADCY8
hsa04270	Vascular smooth muscle contraction	121	43	1.52	0.013416168	CALML6;PLA2G2E;PLA2G5;CALML5;CALML3;PRKCQ;PLA2G12B;PLCB3;PPP1CA;CACNA1C;ADCY4;PLCB2;PLA2G4E;PLA2G4D;PLA2G4F;ADCY9;MYH11;PRKCB;ADCY7;ROCK1;PRKACA;ARHGEF1;CALM3;ADCY3;PRKCE;MYLK2;GNAS;PLA2G3;PLA2G6;ITPR1;RHOA;CACNA1D;MYLK;AGTR1;ADCY2;MYLK4;ITPR3;GNA12;ADCY1;CALD1;BRAF;KCNU1;ADCY8
hsa05226	Gastric cancer	149	51	1.47	0.013416168	DVL1;PIK3CD;MTOR;WNT4;GADD45A;SHC1;WNT3A;AKT3;CTNNA3;WNT8B;MUC2;LRP5;CCND1;FGF19;FGF3;WNT11;FGF23;FGF6;KRAS;FZD10;FGF9;CDX2;CSNK1A1L;SMAD3;CDH1;JUP;WNT3;SHC2;PIK3R2;CCNE1;CTNNA2;FZD5;WNT6;WNT7A;WNT5A;DVL3;FGF5;TERT;PIK3R1;APC;CTNNA1;FGF1;FGF18;RXRB;CDKN1A;HGF;ABCB1;BRAF;SHH;FZD6;RXRA
hsa04911	Insulin secretion	85	32	1.62	0.017661654	ATP1A1;KCNN3;ATP1A2;RYR2;INS;PLCB3;CACNA1C;PDX1;ADCY4;PLCB2;ADCY9;PRKCB;ADCY7;ADCYAP1;PRKACA;KCNN1;RAB3A;ADCY3;CREB1;GNAS;CACNA1D;ADCY2;KCNN2;ATF6B;ITPR3;CREB5;ADCYAP1R1;CAMK2B;ADCY1;PCLO;KCNU1;ADCY8
hsa04010	MAPK signaling pathway	295	90	1.31	0.01938761	RPS6KA1;MKNK1;GADD45A;NGF;EFNA4;CACNA1E;PTPN7;AKT3;CACNB2;MAP3K8;NFKB2;DUSP5;IGF2;INS;BDNF;RPS6KA4;RASGRP2;RELA;FGF19;FGF3;HSPA8;CACNA2D4;CACNA1C;FGF23;FGF6;NTF3;TNFRSF1A;KRAS;PTPRR;FGF9;FLT1;RASGRP1;PLA2G4E;PLA2G4D;PLA2G4F;RASGRF1;IGF1R;CACNA1H;MAPK8IP3;PRKCB;CACNG3;MAP2K3;MAPT;CACNA1G;CACNG5;CACNG4;CACNG1;NFATC1;EFNA2;INSR;MAP2K7;CACNA1A;PRKACA;MAP4K1;RELB;CACNG7;CACNG8;PPM1B;ANGPT4;CACNA1I;MAP…
hsa04728	Dopaminergic synapse	131	45	1.47	0.021103842	CALML6;GNG4;AKT3;CALML5;CALML3;PPP2R2D;DRD4;TH;PLCB3;PPP1CA;CACNA1C;GRIN2B;PPP2R5C;PLCB2;GRIN2A;PRKCB;GNAO1;PPP1R1B;GNG7;CACNA1A;PRKACA;CALM3;KIF5C;CREB1;GNAS;COMT;ITPR1;GNAI2;CACNA1D;DRD3;PPP2R2C;DRD5;GRIA2;SLC6A3;PPP2R2B;MAPK9;ATF6B;ITPR3;CREB5;CAMK2B;DDC;SLC18A1;PPP3CC;PPP2R2A;MAOB
hsa05166	Human T-cell leukemia virus 1 infection	255	79	1.33	0.02113387	DVL1;PIK3CD;WNT4;LCK;WNT3A;AKT3;WNT8B;NFKB2;RELA;CCND1;WNT11;ETS1;CCND2;TNFRSF1A;KRAS;FZD10;POLE;ADCY4;BUB1B;SMAD3;CREBBP;ADCY9;ITGAL;ADCY7;VAC14;KAT2A;WNT3;NFATC1;TCF3;CALR;PRKACA;JAK3;PIK3R2;RELB;ADCY3;CREB1;FZD5;WNT6;NFATC2;IL2RB;EP300;WNT7A;KAT2B;WNT5A;DVL3;MSX1;PTTG2;PDGFRA;SLC25A31;ANAPC10;SLC25A4;TERT;ADCY2;PIK3R1;APC;CSF2;MSX2;CANX;HLA-F;HLA-G;HLA-E;HLA-C;LTA;HLA-DQA2;HLA-DOB;HLA-DMB;HLA-…
hsa04151	PI3K-Akt signaling pathway	354	104	1.26	0.032463563	PIK3CD;MTOR;CASP9;CSF3R;NGF;EFNA4;TNR;LAMC2;LAMB3;GNG4;AKT3;ITGA8;ITGB1;DDIT4;PPP2R2D;IGF2;INS;BDNF;CHRM1;RELA;CCND1;FGF19;FGF3;CCND2;FGF23;FGF6;NTF3;VWF;KRAS;COL2A1;ITGA7;MDM2;FGF9;FLT1;COL4A1;COL4A2;TCL1B;TCL1A;PPP2R5C;THBS1;IGF1R;TSC2;CD19;PIK3R6;PIK3R5;CSF3;G6PC;ITGB3;COL1A1;GH2;GH1;RPTOR;LAMA3;EFNA2;GNG7;INSR;PKN1;JAK3;PIK3R2;CCNE1;ITGA4;CREB1;FN1;ANGPT4;SGK2;LAMA5;IL2RB;LAMB2;COL6A5;FGFR3;P…
hsa04211	Longevity regulating pathway	89	32	1.54	0.034311326	PIK3CD;MTOR;AKT3;INS;RELA;SESN3;KRAS;ATG101;PRKAB1;ULK1;ADCY4;IGF1R;TSC2;ADCY9;ADCY7;RPTOR;INSR;PRKACA;PIK3R2;ADCY3;CREB1;APPL1;ADIPOQ;EIF4E;ADCY2;PIK3R1;EHMT2;ATF6B;CREB5;ADCY1;PRKAG2;ADCY8
hsa05412	Arrhythmogenic right ventricular cardiomyopathy (ARVC)	72	27	1.61	0.034311326	ACTN2;RYR2;ITGA8;CACNB2;ITGB1;CTNNA3;ACTN3;CACNA2D4;CACNA1C;ITGA7;SGCG;CACNG3;JUP;ITGB3;CACNG5;CACNG4;CACNG1;CACNG7;CACNG8;CTNNA2;ITGA4;DAG1;CACNA1D;CTNNA1;SGCD;DSP;DMD
hsa04213	Longevity regulating pathway	62	24	1.66	0.034311326	PIK3CD;MTOR;AKT3;INS;HSPA8;KRAS;PRKAB1;ADCY4;IGF1R;ADCY9;ADCY7;RPTOR;INSR;PRKACA;PIK3R2;ADCY3;FOXA2;ADCY2;PIK3R1;HSPA1L;HSPA1B;ADCY1;PRKAG2;ADCY8
hsa05205	Proteoglycans in cancer	201	63	1.34	0.036425423	PIK3CD;MTOR;HSPG2;WNT4;WNT3A;AKT3;ITGB1;HPSE2;WNT8B;IGF2;PPP1CA;CCND1;CTTN;WNT11;HSPB2;PTPN6;NANOG;KRAS;MDM2;FRS2;FZD10;THBS1;IGF1R;PRKCB;PLCG2;WNT3;ITGB3;ROCK1;PRKACA;PIK3R2;ARHGEF1;HOXD10;MIR10B;FZD5;FN1;WNT6;TWIST2;GPC1;SRC;SDC4;TIAM1;ITPR1;WNT7A;RHOA;WNT5A;HCLS1;PIK3R1;ITPR3;CDKN1A;VEGFA;ESR1;EZR;TWIST1;CAMK2B;HGF;CAV2;FLNC;BRAF;SHH;SDC2;FZD6;TLR4;FLNA
hsa04390	Hippo signaling pathway	154	50	1.39	0.039294403	DVL1;PRKCZ;TP73;WNT4;CRB1;WNT3A;PARD3;CTNNA3;WNT8B;BTRC;PPP2R2D;PPP1CA;CCND1;WNT11;CCND2;FZD10;FRMD6;SMAD3;NKD1;CDH1;DLG4;WNT3;BIRC5;SMAD7;WTIP;CTNNA2;GLI2;FZD5;WNT6;PARD6B;CSNK1E;WNT7A;LIMD1;RASSF1;WNT5A;DVL3;PPP2R2C;APC;CTNNA1;FGF1;PPP2R2B;FBXW11;BMP6;TEAD3;FRMD1;PPP2R2A;SNAI2;GDF6;YWHAZ;FZD6
hsa04744	Phototransduction	28	13	1.99	0.040993425	CALML6;CALML5;CALML3;GRK1;RCVRN;RGS9;PDE6G;CALM3;SAG;GNAT1;RHO;GRK7;PDE6B
hsa04726	Serotonergic synapse	115	39	1.45	0.040993425	HTR6;HTR1D;GNG4;ALOX5;CYP2C18;CYP2C19;PLCB3;HTR3B;HTR3A;CACNA1C;KRAS;HTR2A;GABRB3;PLCB2;PLA2G4E;PLA2G4D;PLA2G4F;PRKCB;GNAO1;ALOX12B;GNG7;CACNA1A;PRKACA;GNAS;ITPR1;GNAI2;CACNA1D;HTR1A;KCNN2;HTR4;DUSP1;ITPR3;HTR1B;DDC;BRAF;SLC18A1;PTGS1;MAOB;HTR2C
hsa04530	Tight junction	170	54	1.36	0.044437797	PRKCZ;CD1B;CD1E;ITGB1;PARD3;PPP2R2D;CCND1;CTTN;AMOTL1;JAM3;TUBA1A;MYL2;PRKAB1;TUBA3C;CLDN10;WHAMM;CLDN9;MYH11;MYH10;MYH8;MYH4;MYH2;MYH3;MYL12B;ROCK1;NEDD4L;ARHGEF18;MAP2K7;PRKACA;ACTN4;PRKCE;SRC;PARD6B;CLDN8;TIAM1;MYH9;RHOA;CACNA1D;HCLS1;CLDN18;CLDN11;PPP2R2C;MARVELD2;OCLN;PPP2R2B;SYNPO;MAPK9;EZR;MICALL2;PRKAG2;ACTR3B;GATA4;PPP2R2A;WAS
