# Supplementary material for: Upper Aerodigestive Tract Squamous Cell Carcinomas Show Distinct Overall DNA Methylation Profiles and Different Molecular Mechanisms behind WNT Signaling Disruption
Source: Cancers (Basel). 2021 Jun 16;13(12):3014. doi: 10.3390/cancers13123014 (PMC8234055; doi:10.3390/cancers13123014)
Supplement: Supplementary file 1 [file cancers-13-03014-s001.zip › Table S6.xlsx]

## Sheet: Table S6
Table S6: DMR description and correlation with the expression of the associated gene in ESCC, LSCC, OSCC and OPSCC.
ESCC WNT signaling pathway DMRs
	chromosome	start	end	width	strand	NumOfProbe	min_p.value	min_p.adjust	Profile in tumors	GeneSymbol	distance2TSS	PROMOTER	DMR_ID	rho	p_adj
ESCC_DMR1	chr7	44278309	44280051	1743	*	10	1.85E-06	2.38E-05	hypomethylated	CAMK2B	85179	FALSE	CAMK2B-DMR1-outside_promoter	0.38460	2.20E-03
ESCC_DMR2	chr7	44349295	44349715	421	*	5	3.25E-06	3.79E-05	hypermethylated	CAMK2B	15515	FALSE	CAMK2B-DMR2-outside_promoter	-0.04616	7.79E-01
ESCC_DMR3	chr11	69456412	69457121	710	*	6	6.49E-06	6.77E-05	hypomethylated	CCND1	539	FALSE	CCND1-DMR1-outside_promoter	-0.37575	2.78E-03
ESCC_DMR4	chr11	69468337	69469820	1484	*	14	1.30E-08	4.22E-07	hypermethylated	CCND1	12464	FALSE	CCND1-DMR2-outside_promoter	-0.34347	6.69E-03
ESCC_DMR5	chr13	37679573	37679978	406	*	5	3.26E-04	1.80E-03	hypomethylated	CSNK1A1L	0	TRUE	CSNK1A1L-promoter	0.01093	9.40E-01
ESCC_DMR6	chr6	31635781	31637196	1416	*	13	9.03E-15	7.34E-12	hypermethylated	CSNK2B	1183	FALSE	CSNK2B-outside_promoter	0.06007	7.22E-01
ESCC_DMR7	chr4	1204956	1208960	4005	*	13	5.92E-19	1.17E-14	hypermethylated	CTBP1	33948	FALSE	CTBP1-DMR1-outside_promoter	-0.04280	7.88E-01
ESCC_DMR8	chr4	1212539	1217755	5217	*	14	1.00E-18	1.36E-14	hypermethylated	CTBP1	19286	FALSE	CTBP1-DMR2-outside_promoter	-0.16350	2.31E-01
ESCC_DMR9	chr4	1235292	1240264	4973	*	10	4.78E-13	1.39E-10	hypermethylated	CTBP1	0	TRUE	CTBP1-promoter	-0.07263	6.45E-01
ESCC_DMR10	chr10	126712941	126714382	1442	*	6	7.79E-06	7.86E-05	hypermethylated	CTBP2	2071	FALSE	CTBP2-outside_promoter	-0.19264	1.60E-01
ESCC_DMR11	chr1	9895799	9910137	14339	*	5	3.11E-09	1.34E-07	hypermethylated	CTNNBIP1	60179	FALSE	CTNNBIP1-outside_promoter	-0.47870	9.03E-05
ESCC_DMR12	chr8	42234243	42235916	1674	*	9	3.30E-10	2.26E-08	hypermethylated	DKK4	0	TRUE	DKK4-promoter	-0.45921	1.51E-04
ESCC_DMR13	chr3	183889395	183892060	2666	*	7	1.37E-10	1.13E-08	hypermethylated	DVL3	7115	FALSE	DVL3-outside_promoter	-0.17875	1.99E-01
ESCC_DMR14	chr5	171094783	171095097	315	*	5	1.64E-07	3.27E-06	hypermethylated	FBXW11	328894	FALSE	FBXW11-outside_promoter	0.30492	1.63E-02
ESCC_DMR15	chr11	65668067	65668299	233	*	6	8.54E-04	4.02E-03	hypermethylated	FOSL1	-70	TRUE	FOSL1-promoter	-0.09980	5.12E-01
ESCC_DMR16	chr7	90895027	90896701	1675	*	6	1.40E-06	1.89E-05	hypermethylated	FZD1	1244	FALSE	FZD1-outside_promoter	-0.44365	2.99E-04
ESCC_DMR17	chr2	202901045	202904337	3293	*	6	1.55E-06	2.05E-05	hypomethylated	FZD7	1735	FALSE	FZD7-outside_promoter	-0.65919	0.00E+00
ESCC_DMR18	chr1	59229260	59235119	5860	*	5	3.69E-06	4.22E-05	hypermethylated	JUN	14666	FALSE	JUN-outside_promoter	0.19205	1.60E-01
ESCC_DMR19	chr6	91321677	91325155	3479	*	5	7.36E-11	6.99E-09	hypermethylated	MAP3K7	-24657	FALSE	MAP3K7-outside_promoter	0.31495	1.28E-02
ESCC_DMR20	chr8	128746896	128747564	669	*	7	3.68E-06	4.21E-05	hypomethylated	MYC	-201	TRUE	MYC-promoter	-0.14645	2.82E-01
ESCC_DMR21	chr18	18511878	18512278	401	*	5	1.61E-04	9.97E-04	hypomethylated	ROCK1	179534	FALSE	ROCK1-outside_promoter	NA	NA
ESCC_DMR22	chr18	77230484	77231654	1171	*	5	5.40E-10	3.31E-08	hypermethylated	NFATC1	70158	FALSE	NFATC1-DMR1-outside_promoter	0.08823	5.63E-01
ESCC_DMR23	chr18	77335239	77337219	1981	*	6	3.37E-10	2.29E-08	hypermethylated	NFATC1	48120	FALSE	NFATC1-DMR2-outside_promoter	-0.04024	7.91E-01
ESCC_DMR24	chr20	50104944	50109375	4432	*	5	3.50E-11	3.95E-09	hypermethylated	NFATC2	49883	FALSE	NFATC2-outside_promoter	0.15388	2.64E-01
ESCC_DMR25	chr20	50159160	50159653	494	*	5	1.03E-04	6.87E-04	hypermethylated	NFATC2	0	TRUE	NFATC2-promoter	-0.02087	8.85E-01
ESCC_DMR26	chr5	1016279	1016768	490	*	5	5.68E-14	2.82E-11	hypermethylated	NKD2	7202	FALSE	NKD2-DMR1-outside_promoter	0.60014	1.55E-07
ESCC_DMR27	chr5	1028233	1034427	6195	*	8	2.43E-06	2.99E-05	hypomethylated	NKD2	19156	FALSE	NKD2-DMR2-outside_promoter	0.51992	1.82E-05
ESCC_DMR28	chr15	40599680	40601467	1788	*	9	8.81E-09	3.09E-07	hypomethylated	PLCB2	0	TRUE	PLCB2-promoter	-0.08388	5.80E-01
ESCC_DMR29	chrX	48367969	48370301	2333	*	8	5.07E-06	5.50E-05	hypermethylated	PORCN	0	TRUE	PORCN-promoter	-0.16999	2.13E-01
ESCC_DMR30	chr14	102247610	102248253	644	*	5	9.26E-06	9.09E-05	hypermethylated	PPP2R5C	19475	FALSE	PPP2R5C-outside_promoter	0.24785	6.31E-02
ESCC_DMR31	chr14	102276033	102276267	235	*	5	7.66E-04	3.68E-03	hypomethylated	PPP2R5C	0	TRUE	PPP2R5C-promoter	-0.33028	8.48E-03
ESCC_DMR32	chr3	64210991	64211659	669	*	6	1.42E-07	2.91E-06	hypermethylated	PRICKLE2	0	TRUE	PRICKLE2-promoter	-0.05025	7.65E-01
ESCC_DMR33	chr3	64251663	64255618	3956	*	9	2.00E-09	9.50E-08	hypermethylated	PRICKLE2	-40532	FALSE	PRICKLE2-outside_promoter	-0.25131	6.08E-02
ESCC_DMR34	chr19	14224992	14225172	181	*	5	4.36E-04	2.30E-03	hypomethylated	PRKACA	0	TRUE	PRKACA-promoter	-0.21902	1.07E-01
ESCC_DMR35	chr17	64640562	64672341	31780	*	7	1.53E-08	4.80E-07	hypermethylated	PRKCA	341636	FALSE	PRKCA-outside_promoter	0.17240	2.10E-01
ESCC_DMR36	chr8	41079627	41122613	42987	*	6	1.46E-08	4.63E-07	hypomethylated	SFRP1	44377	FALSE	SFRP1-outside_promoter	0.35955	4.20E-03
ESCC_DMR37	chr8	41167660	41178923	11264	*	17	1.36E-10	1.13E-08	hypomethylated	SFRP1	-670	TRUE	SFRP1-promoter	0.29539	2.03E-02
ESCC_DMR38	chr4	154711099	154711906	808	*	17	3.67E-06	4.20E-05	hypomethylated	SFRP2	-871	TRUE	SFRP2-promoter	-0.03040	8.48E-01
ESCC_DMR39	chr7	37956850	37957021	172	*	6	2.27E-05	1.92E-04	hypomethylated	SFRP4	-325	TRUE	SFRP4-promoter	0.14074	3.01E-01
ESCC_DMR40	chr15	67429693	67439567	9875	*	6	7.40E-13	1.96E-10	hypermethylated	SMAD3	0	TRUE	SMAD3-DMR1-promoter	-0.33178	8.48E-03
ESCC_DMR41	chr15	67457584	67477726	20143	*	12	3.90E-07	6.61E-06	hypermethylated	SMAD3	0	TRUE	SMAD3-DMR2-promoter	-0.43794	3.22E-04
ESCC_DMR42	chr8	55370192	55371829	1638	*	15	1.94E-06	2.47E-05	hypermethylated	SOX17	0	TRUE	SOX17-promoter	-0.02620	8.62E-01
ESCC_DMR43	chr8	55379566	55380185	620	*	5	1.11E-04	7.31E-04	hypermethylated	SOX17	9071	FALSE	SOX17-outside_promoter	0.00790	9.44E-01
ESCC_DMR44	chr5	133451021	133451625	605	*	9	3.24E-07	5.70E-06	hypermethylated	TCF7	0	TRUE	TCF7-promoter	-0.34022	6.96E-03
ESCC_DMR45	chr1	160369840	160370208	369	*	5	1.38E-06	1.86E-05	hypermethylated	VANGL2	-23	TRUE	VANGL2-promoter	-0.44234	2.99E-04
ESCC_DMR46	chr12	49371628	49374320	2693	*	15	4.46E-07	7.39E-06	hypermethylated	WNT1	0	TRUE	WNT1-promoter	-0.24173	6.93E-02
ESCC_DMR47	chr17	44889584	44895317	5734	*	5	2.14E-09	9.99E-08	hypermethylated	WNT3	809	FALSE	WNT3-outside_promoter	0.22841	9.07E-02
ESCC_DMR48	chr17	44896748	44898510	1763	*	7	2.33E-08	6.70E-07	hypomethylated	WNT3	-622	TRUE	WNT3-promoter	0.20438	1.40E-01
ESCC_DMR49	chr1	228196198	228223346	27149	*	7	4.97E-05	3.72E-04	hypomethylated	WNT3A	1475	FALSE	WNT3A-outside_promoter	0.49752	4.43E-05
ESCC_DMR50	chr1	22441051	22446854	5804	*	8	1.50E-10	1.22E-08	hypermethylated	WNT4	22665	FALSE	WNT4-outside_promoter	-0.05808	7.22E-01
ESCC_DMR51	chr3	55523815	55525577	1763	*	5	1.67E-08	5.16E-07	hypermethylated	WNT5A	-2145	FALSE	WNT5A-outside_promoter	-0.17552	2.05E-01
ESCC_DMR52	chr12	1721081	1736189	15109	*	11	3.15E-17	1.25E-13	hypermethylated	WNT5B	0	TRUE	WNT5B-promoter	0.15172	2.66E-01
ESCC_DMR53	chr2	219718848	219723705	4858	*	5	1.29E-05	1.19E-04	hypermethylated	WNT6	-841	TRUE	WNT6-promoter	-0.09015	5.63E-01
ESCC_DMR54	chr2	219736167	219738732	2566	*	10	8.44E-06	8.41E-05	hypomethylated	WNT6	11621	FALSE	WNT6-outside_promoter	0.36619	3.60E-03
ESCC_DMR55	chr3	13894328	13896256	1929	*	6	2.82E-06	3.38E-05	hypomethylated	WNT7A	25362	FALSE	WNT7A-outside_promoter	-0.40544	1.10E-03
ESCC_DMR56	chr1	228075423	228075749	327	*	5	3.19E-06	3.73E-05	hypomethylated	WNT9A	59927	FALSE	WNT9A-DMR1-outside_promoter	-0.10077	5.12E-01
ESCC_DMR57	chr1	228112806	228113207	402	*	5	5.04E-13	1.45E-10	hypermethylated	WNT9A	22469	FALSE	WNT9A-DMR2-outside_promoter	0.19844	1.52E-01
LSCC WNT signaling pathway DMRs
	chromosome	start	end	width	strand	NumOfProbe	min_p.value	min_p.adjust	Profile in tumors	GeneSymbol	distance2TSS	PROMOTER	DMR_ID	rho	p_adj
LSCC_DMR1	chr12	130683325	130683639	315	*	5	2.84E-04	3.94E-03	hypomethylated	FZD10	36321	FALSE	FZD10-outside_promoter	0.53868	3.63E-07
LSCC_DMR2	chr13	37679324	37679978	655	*	6	4.73E-04	5.65E-03	hypomethylated	CSNK1A1L	0	TRUE	CSNK1A1L-promoter	-0.07600	6.67E-01
LSCC_DMR3	chr17	42635310	42636570	1261	*	5	4.99E-05	1.16E-03	hypermethylated	FZD2	498	FALSE	FZD2-outside_promoter	-0.05403	7.55E-01
LSCC_DMR4	chr18	18511878	18512278	401	*	5	2.43E-04	3.53E-03	hypomethylated	ROCK1	179534	FALSE	ROCK1-DMR1-outside_promoter	NA	NA
LSCC_DMR5	chr18	18518902	18520214	1313	*	5	1.09E-05	4.00E-04	hypomethylated	ROCK1	171598	FALSE	ROCK1-DMR2-outside_promoter	NA	NA
LSCC_DMR6	chr4	1208147	1208960	814	*	7	1.37E-07	1.86E-05	hypermethylated	CTBP1	33948	FALSE	CTBP1-DMR1-outside_promoter	-0.20876	1.09E-01
LSCC_DMR7	chr4	1214454	1217755	3302	*	13	1.92E-11	6.75E-08	hypermethylated	CTBP1	19286	FALSE	CTBP1-DMR2-outside_promoter	-0.22943	1.09E-01
LSCC_DMR8	chr6	31636140	31636422	283	*	7	4.75E-04	5.66E-03	hypermethylated	CSNK2B	1542	FALSE	CSNK2B-outside_promoter	-0.00931	9.51E-01
LSCC_DMR9	chr7	44275556	44279273	3718	*	6	5.28E-05	1.20E-03	hypomethylated	CAMK2B	85957	FALSE	CAMK2B-DMR1-outside_promoter	-0.00642	9.51E-01
LSCC_DMR10	chr7	44348976	44349955	980	*	7	1.21E-05	4.28E-04	hypermethylated	CAMK2B	15275	FALSE	CAMK2B-DMR2-outside_promoter	-0.09813	5.77E-01
LSCC_DMR11	chr8	55370192	55372111	1920	*	16	2.00E-05	6.07E-04	hypermethylated	SOX17	0	TRUE	SOX17-promoter	-0.20952	1.09E-01
LSCC_DMR12	chr8	104310380	104311085	706	*	9	8.11E-05	1.63E-03	hypomethylated	FZD6	0	TRUE	FZD6-promoter	-0.13496	3.89E-01
OSCC WNT signaling pathway DMRs
	chromosome	start	end	width	strand	NumOfProbe	min_p.value	min_p.adjust	Profile in tumors	GeneSymbol	distance2TSS	PROMOTER	DMR_ID	rho	p_adj
OSCC_DMR1	chr11	68141470	68142605	1136	*	6	5.06E-05	1.71E-03	hypermethylated	LRP5	61362	FALSE	LRP5-outside_promoter	0.25584	1.92E-04
OSCC_DMR2	chr16	23846838	23848003	1166	*	9	3.25E-05	1.28E-03	hypermethylated	PRKCB	0	TRUE	PRKCB-promoter	-0.23451	6.33E-04
OSCC_DMR3	chr18	18511878	18512421	544	*	6	2.14E-04	4.50E-03	hypomethylated	ROCK1	179391	FALSE	ROCK1-outside_promoter	-0.09305	1.83E-01
OSCC_DMR4	chr19	54410999	54412993	1995	*	7	2.21E-05	9.93E-04	hypermethylated	PRKCG	24086	FALSE	PRKCG-outside_promoter	-0.21991	1.27E-03
OSCC_DMR5	chr20	8112754	8113630	877	*	7	3.75E-05	1.40E-03	hypermethylated	PLCB1	0	TRUE	PLCB1-promoter	-0.18075	8.00E-03
OSCC_DMR6	chr4	107956287	107958572	2286	*	12	1.44E-06	1.96E-04	hypermethylated	DKK2	0	TRUE	DKK2-promoter	-0.26939	8.63E-05
OSCC_DMR7	chr4	154710353	154711070	718	*	20	2.63E-05	1.11E-03	hypermethylated	SFRP2	-125	TRUE	SFRP2-promoter	-0.20056	3.32E-03
OSCC_DMR8	chr6	41909703	41910019	317	*	5	1.26E-04	3.13E-03	hypomethylated	CCND3	106591	FALSE	CCND3-outside_promoter	0.15332	2.45E-02
OSCC_DMR9	chr7	37955508	37956869	1362	*	14	1.18E-04	3.01E-03	hypermethylated	SFRP4	0	TRUE	SFRP4-promoter	-0.34094	3.99E-07
OSCC_DMR10	chr8	55366152	55367627	1476	*	8	5.93E-08	3.89E-05	hypermethylated	SOX17	-2868	FALSE	SOX17-DMR1-outside_promoter	-0.41643	6.92E-10
OSCC_DMR11	chr8	55370192	55372569	2378	*	18	2.82E-09	8.37E-06	hypermethylated	SOX17	0	TRUE	SOX17-promoter	-0.37416	2.29E-08
OSCC_DMR12	chr8	55379034	55380185	1152	*	8	2.37E-07	7.52E-05	hypermethylated	SOX17	8539	FALSE	SOX17-DMR2-outside_promoter	-0.39087	6.13E-09
OSCC_DMR13	chr8	128747520	128747873	354	*	6	7.73E-04	1.08E-02	hypomethylated	MYC	0	TRUE	MYC-DMR1-promoter	0.08242	2.26E-01
OSCC_DMR14	chr8	128748234	128748481	248	*	5	4.62E-04	7.60E-03	hypomethylated	MYC	0	TRUE	MYC-DMR2-promoter	0.05117	4.37E-01
OPSCC WNT signaling pathway DMRs
	chromosome	start	end	width	strand	NumOfProbe	min_p.value	min_p.adjust	Profile in tumors	GeneSymbol	distance2TSS	PROMOTER	DMR_ID	rho	p_adj
OPSCC_DMR1	chr1	1271760	1272559	800	*	6	6.56E-04	2.69E-03	hypomethylated	DVL1	2998	FALSE	DVL1-outside_promoter	0.34260	2.01E-02
OPSCC_DMR2	chr1	9895799	9910137	14339	*	5	1.74E-06	4.31E-05	hypomethylated	CTNNBIP1	60179	FALSE	CTNNBIP1-DMR1-outside_promoter	-0.33730	2.04E-02
OPSCC_DMR3	chr1	9943273	9968130	24858	*	6	1.46E-04	8.83E-04	hypomethylated	CTNNBIP1	2186	FALSE	CTNNBIP1-DMR2-outside_promoter	-0.29847	4.16E-02
OPSCC_DMR4	chr1	22441051	22446661	5611	*	6	1.31E-04	8.17E-04	hypomethylated	WNT4	22858	FALSE	WNT4-DMR1-outside_promoter	-0.23953	1.02E-01
OPSCC_DMR5	chr1	22454064	22457820	3757	*	5	7.19E-05	5.28E-04	hypomethylated	WNT4	11699	FALSE	WNT4-DMR2-outside_promoter	0.25459	8.31E-02
OPSCC_DMR6	chr1	160342957	160370208	27252	*	9	2.72E-07	1.44E-05	hypomethylated	VANGL2	-23	TRUE	VANGL2-promoter	-0.40650	6.06E-03
OPSCC_DMR7	chr1	228195779	228196376	598	*	5	1.95E-06	4.61E-05	hypermethylated	WNT3A	1056	FALSE	WNT3A-outside_promoter	0.28798	4.87E-02
OPSCC_DMR8	chr10	99532386	99533109	724	*	5	3.55E-04	1.69E-03	hypomethylated	SFRP5	-630	TRUE	SFRP5-promoter	0.42127	5.00E-03
OPSCC_DMR9	chr10	102221867	102222865	999	*	6	1.25E-05	1.55E-04	hypomethylated	WNT8B	0	TRUE	WNT8B-promoter	0.19085	1.96E-01
OPSCC_DMR10	chr10	103113524	103113933	410	*	8	2.92E-05	2.79E-04	hypermethylated	BTRC	0	TRUE	BTRC-promoter	-0.18491	2.10E-01
OPSCC_DMR11	chr10	126751950	126754386	2437	*	5	5.29E-06	8.76E-05	hypomethylated	CTBP2	92899	FALSE	CTBP2-outside_promoter	0.00460	9.70E-01
OPSCC_DMR12	chr11	64022763	64023919	1157	*	8	6.81E-06	1.03E-04	hypomethylated	PLCB3	3768	FALSE	PLCB3-outside_promoter	0.21746	1.38E-01
OPSCC_DMR13	chr11	68153810	68154400	591	*	5	3.72E-05	3.30E-04	hypomethylated	LRP5	73702	FALSE	LRP5-DMR1-outside_promoter	0.12748	4.21E-01
OPSCC_DMR14	chr11	68181087	68183902	2816	*	7	2.76E-06	5.76E-05	hypomethylated	LRP5	100979	FALSE	LRP5-DMR2-outside_promoter	0.07848	6.41E-01
OPSCC_DMR15	chr11	69460951	69461451	501	*	5	1.90E-04	1.07E-03	hypomethylated	CCND1	5078	FALSE	CCND1-DMR1-outside_promoter	0.40278	6.06E-03
OPSCC_DMR16	chr11	69469175	69469820	646	*	7	4.56E-07	1.94E-05	hypomethylated	CCND1	13302	FALSE	CCND1-DMR2-outside_promoter	0.19324	1.93E-01
OPSCC_DMR17	chr11	75904184	75907205	3022	*	5	9.37E-06	1.28E-04	hypomethylated	WNT11	10337	FALSE	WNT11-outside_promoter	0.34045	2.01E-02
OPSCC_DMR18	chr12	4312337	4361135	48799	*	7	1.75E-07	1.14E-05	hypomethylated	CCND2	-21767	FALSE	CCND2-outside_promoter	0.28791	4.87E-02
OPSCC_DMR19	chr12	42853791	42863385	9595	*	7	1.91E-05	2.08E-04	hypomethylated	PRICKLE1	14031	FALSE	PRICKLE1-outside_promoter	0.50088	8.41E-04
OPSCC_DMR20	chr12	130683325	130683639	315	*	5	4.45E-04	2.00E-03	hypomethylated	FZD10	36321	FALSE	FZD10-outside_promoter	0.34677	2.01E-02
OPSCC_DMR21	chr13	37679573	37680829	1257	*	7	1.06E-04	7.00E-04	hypomethylated	CSNK1A1L	0	TRUE	CSNK1A1L-promoter	0.12148	4.40E-01
OPSCC_DMR22	chr14	102391388	102391830	443	*	5	2.95E-06	6.00E-05	hypomethylated	PPP2R5C	115248	FALSE	PPP2R5C-outside_promoter	0.12061	4.40E-01
OPSCC_DMR23	chr15	40580770	40583422	2653	*	5	9.00E-06	1.25E-04	hypomethylated	PLCB2	108	FALSE	PLCB2-outside_promoter	0.40910	6.06E-03
OPSCC_DMR24	chr15	40599985	40600635	651	*	7	8.37E-05	5.89E-04	hypermethylated	PLCB2	0	TRUE	PLCB2-promoter	-0.22167	1.35E-01
OPSCC_DMR25	chr15	67411858	67426538	14681	*	8	1.89E-07	1.18E-05	hypomethylated	SMAD3	0	TRUE	SMAD3-DMR1-promoter	-0.34538	2.01E-02
OPSCC_DMR26	chr15	67457584	67470870	13287	*	11	1.67E-06	4.21E-05	hypomethylated	SMAD3	0	TRUE	SMAD3-DMR2-promoter	-0.39682	6.45E-03
OPSCC_DMR27	chr16	3776234	3777990	1757	*	7	7.19E-04	2.88E-03	hypomethylated	CREBBP	152131	FALSE	CREBBP-outside_promoter	-0.14154	3.65E-01
OPSCC_DMR28	chr16	23881993	23962572	80580	*	5	1.68E-07	1.11E-05	hypomethylated	PRKCB	34693	FALSE	PRKCB-outside_promoter	0.47881	8.41E-04
OPSCC_DMR29	chr16	50610163	50616055	5893	*	6	1.85E-06	4.47E-05	hypomethylated	NKD1	27922	FALSE	NKD1-outside_promoter	0.34344	2.01E-02
OPSCC_DMR30	chr17	44896748	44897512	765	*	6	2.21E-05	2.30E-04	hypermethylated	WNT3	-622	TRUE	WNT3-promoter	0.21209	1.47E-01
OPSCC_DMR31	chr18	18511878	18512421	544	*	6	9.91E-05	6.65E-04	hypomethylated	ROCK1	179391	FALSE	ROCK1-outside_promoter	0.16171	2.87E-01
OPSCC_DMR32	chr18	77159786	77160396	611	*	8	1.29E-06	3.59E-05	hypermethylated	NFATC1	0	TRUE	NFATC1-promoter	0.09532	5.57E-01
OPSCC_DMR33	chr18	77283493	77286260	2768	*	6	9.60E-07	2.99E-05	hypermethylated	NFATC1	123167	FALSE	NFATC1-DMR1-outside_promoter	-0.24885	9.02E-02
OPSCC_DMR34	chr18	77289084	77291035	1952	*	5	1.42E-07	1.02E-05	hypomethylated	NFATC1	1965	FALSE	NFATC1-DMR2-outside_promoter	0.28451	5.04E-02
OPSCC_DMR35	chr18	77312717	77316152	3436	*	8	1.21E-04	7.70E-04	hypomethylated	NFATC1	25598	FALSE	NFATC1-DMR3-outside_promoter	0.04578	7.85E-01
OPSCC_DMR36	chr18	77329394	77336267	6874	*	7	1.95E-04	1.09E-03	hypomethylated	NFATC1	42275	FALSE	NFATC1-DMR4-outside_promoter	-0.06931	6.69E-01
OPSCC_DMR37	chr19	14224992	14225172	181	*	5	5.00E-05	4.08E-04	hypomethylated	PRKACA	0	TRUE	PRKACA-promoter	-0.24147	1.01E-01
OPSCC_DMR38	chr2	208635605	208636032	428	*	6	4.97E-04	2.18E-03	hypermethylated	FZD5	-1462	TRUE	FZD5-promoter	0.48539	8.41E-04
OPSCC_DMR39	chr2	219738226	219738732	507	*	5	1.69E-06	4.24E-05	hypermethylated	WNT6	13680	FALSE	WNT6-outside_promoter	0.10683	4.98E-01
OPSCC_DMR40	chr20	447168	467753	20586	*	5	9.07E-05	6.25E-04	hypomethylated	CSNK2A1	56729	FALSE	CSNK2A1-outside_promoter	-0.31440	3.30E-02
OPSCC_DMR41	chr20	50158996	50159653	658	*	6	4.68E-04	2.08E-03	hypermethylated	NFATC2	0	TRUE	NFATC2-promoter	-0.31461	3.30E-02
OPSCC_DMR42	chr22	38713874	38714466	593	*	10	1.43E-05	1.70E-04	hypomethylated	CSNK1E	0	TRUE	CSNK1E-promoter	-0.21695	1.38E-01
OPSCC_DMR43	chr22	41572924	41573176	253	*	6	6.76E-04	2.75E-03	hypomethylated	EP300	84310	FALSE	EP300-outside_promoter	-0.26942	6.52E-02
OPSCC_DMR44	chr3	13895992	13896256	265	*	5	2.56E-05	2.54E-04	hypomethylated	WNT7A	25362	FALSE	WNT7A-outside_promoter	-0.30300	4.13E-02
OPSCC_DMR45	chr3	49397613	49446510	48898	*	6	9.12E-07	2.91E-05	hypomethylated	RHOA	2918	FALSE	RHOA-outside_promoter	-0.06851	6.69E-01
OPSCC_DMR46	chr3	49449349	49449848	500	*	11	2.89E-04	1.45E-03	hypermethylated	RHOA	0	TRUE	RHOA-promoter	0.02795	8.65E-01
OPSCC_DMR47	chr3	55502488	55504433	1946	*	5	5.25E-07	2.11E-05	hypomethylated	WNT5A	10528	FALSE	WNT5A-outside_promoter	-0.36028	1.78E-02
OPSCC_DMR48	chr3	183888295	183890761	2467	*	6	2.92E-06	5.96E-05	hypomethylated	DVL3	6015	FALSE	DVL3-outside_promoter	-0.30088	4.13E-02
OPSCC_DMR49	chr4	1224499	1227091	2593	*	7	6.69E-06	1.02E-04	hypomethylated	CTBP1	9950	FALSE	CTBP1-outside_promoter	-0.26127	7.49E-02
OPSCC_DMR50	chr4	154711675	154712580	906	*	5	1.07E-06	3.20E-05	hypermethylated	SFRP2	-1447	TRUE	SFRP2-promoter	-0.15086	3.28E-01
OPSCC_DMR51	chr5	1037979	1049840	11862	*	13	4.45E-07	1.91E-05	hypomethylated	NKD2	28902	FALSE	NKD2-outside_promoter	-0.13559	3.87E-01
OPSCC_DMR52	chr5	112042650	112043194	545	*	13	6.61E-05	4.98E-04	hypomethylated	APC	-8	TRUE	APC-promoter	0.04531	7.85E-01
OPSCC_DMR53	chr5	171072513	171234429	161917	*	17	2.66E-07	1.43E-05	hypomethylated	FBXW11	189562	FALSE	FBXW11-outside_promoter	0.09116	5.72E-01
OPSCC_DMR54	chr5	179643370	179660783	17414	*	6	5.37E-07	2.14E-05	hypomethylated	MAPK9	58288	FALSE	MAPK9-outside_promoter	0.02711	8.65E-01
OPSCC_DMR55	chr6	31635200	31638016	2817	*	22	6.56E-06	1.01E-04	hypomethylated	CSNK2B	602	FALSE	CSNK2B-outside_promoter	0.11849	4.42E-01
OPSCC_DMR56	chr6	91296664	91297190	527	*	10	6.47E-04	2.66E-03	hypermethylated	MAP3K7	0	TRUE	MAP3K7-promoter	0.00913	9.56E-01
OPSCC_DMR57	chr7	37924598	37956018	31421	*	10	5.13E-06	8.58E-05	hypermethylated	SFRP4	507	FALSE	SFRP4-outside_promoter	-0.04169	7.95E-01
OPSCC_DMR58	chr7	44275556	44281560	6005	*	12	1.90E-05	2.07E-04	hypomethylated	CAMK2B	83670	FALSE	CAMK2B-outside_promoter	0.27519	5.97E-02
OPSCC_DMR59	chr8	22298240	22298586	347	*	8	8.93E-04	3.40E-03	hypermethylated	PPP3CC	0	TRUE	PPP3CC-promoter	-0.23434	1.09E-01
OPSCC_DMR60	chr8	55366152	55367466	1315	*	6	1.20E-05	1.52E-04	hypermethylated	SOX17	-3029	FALSE	SOX17-DMR1-outside_promoter	-0.07223	6.69E-01
OPSCC_DMR61	chr8	55370192	55371013	822	*	12	1.85E-04	1.05E-03	hypermethylated	SOX17	0	TRUE	SOX17-promoter	0.01911	9.04E-01
OPSCC_DMR62	chr8	55379034	55380008	975	*	7	7.10E-05	5.23E-04	hypermethylated	SOX17	8539	FALSE	SOX17-DMR2-outside_promoter	-0.06496	6.80E-01
OPSCC_DMR63	chr8	104310380	104310886	507	*	7	1.82E-05	2.01E-04	hypomethylated	FZD6	0	TRUE	FZD6-promoter	-0.20446	1.63E-01
OPSCC_DMR64	chrX	48367969	48368195	227	*	7	1.71E-05	1.93E-04	hypomethylated	PORCN	0	TRUE	PORCN-promoter	-0.18316	2.11E-01
